# Supplementary material for: Denitrative imino-diaza-Nazarov cyclization: synthesis of pyrazoles
Source: Royal Society of Chemistry journal article supplement (doi:10.1039/d0ob01200a), 2020-01-01

## Denitrative Imino-Diaza-Nazarov Cyclization: Synthesis of Pyrazoles

Balakrishna Aegurla, Nisha Jarwal and Rama Krishna Peddinti\*  
*Department of Chemistry, Indian Institute of Technology Roorkee*  
*Roorkee-247667, Uttarakhand, India*

---

### SUPPLEMENTARY INFORMATION

---

|                                                                                               |          |
|-----------------------------------------------------------------------------------------------|----------|
| Table of Contents .....                                                                       | S-1      |
| Figure S1: ORTEP plot of crystal structure of <b>7c</b> .....                                 | S-2      |
| Figure S2. Monitoring reaction of <b>1a</b> and <b>2a</b> by <sup>1</sup> H NMR analysis..... | S-3      |
| Scheme S1: Plausible reaction mechanism.....                                                  | S-4      |
| Prototropic tautomers.....                                                                    | S-4      |
| <sup>1</sup> H and <sup>13</sup> C NMR and DEPT spectra of substituted pyrazoles.....         | S-5–S-25 |

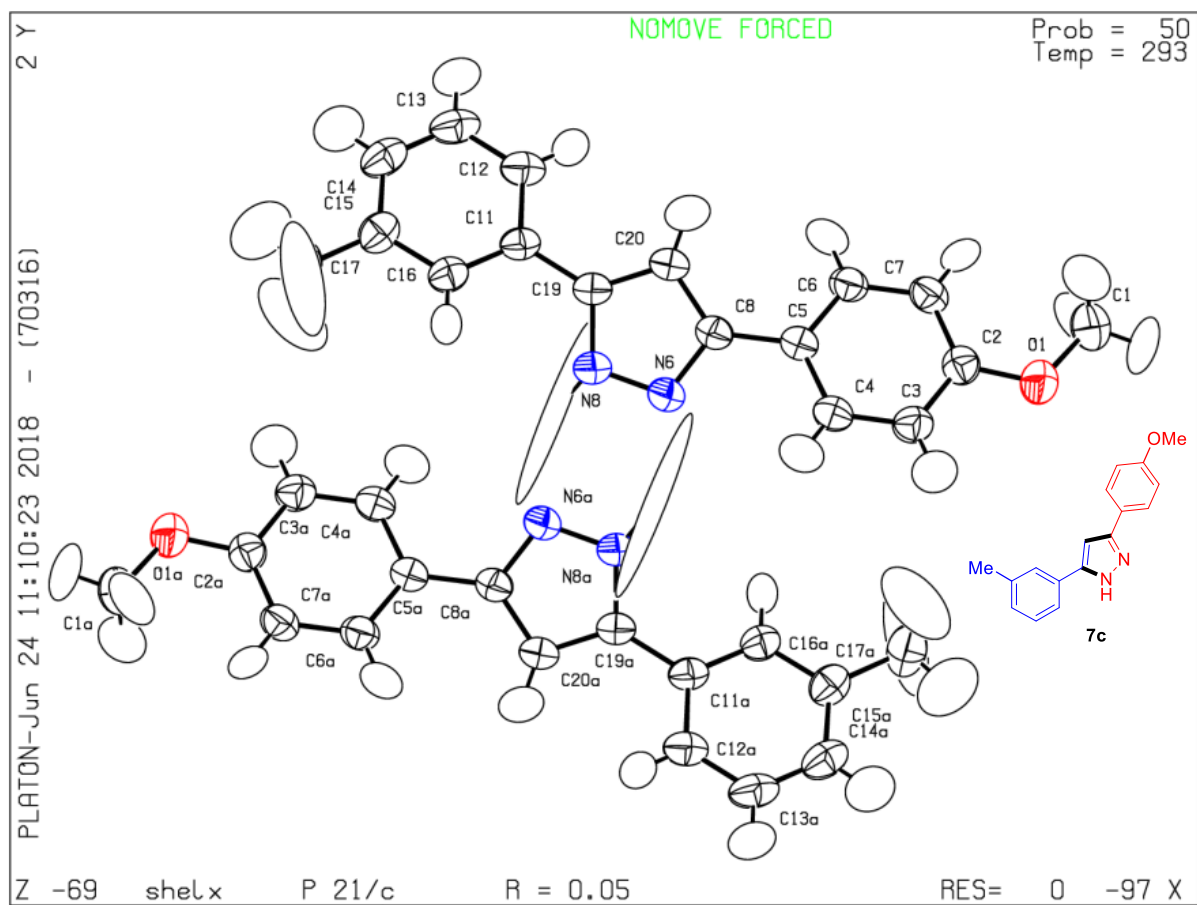

**Figure S1.** ORTEP plot of crystal structure of **7c** (numbering is arbitrary).

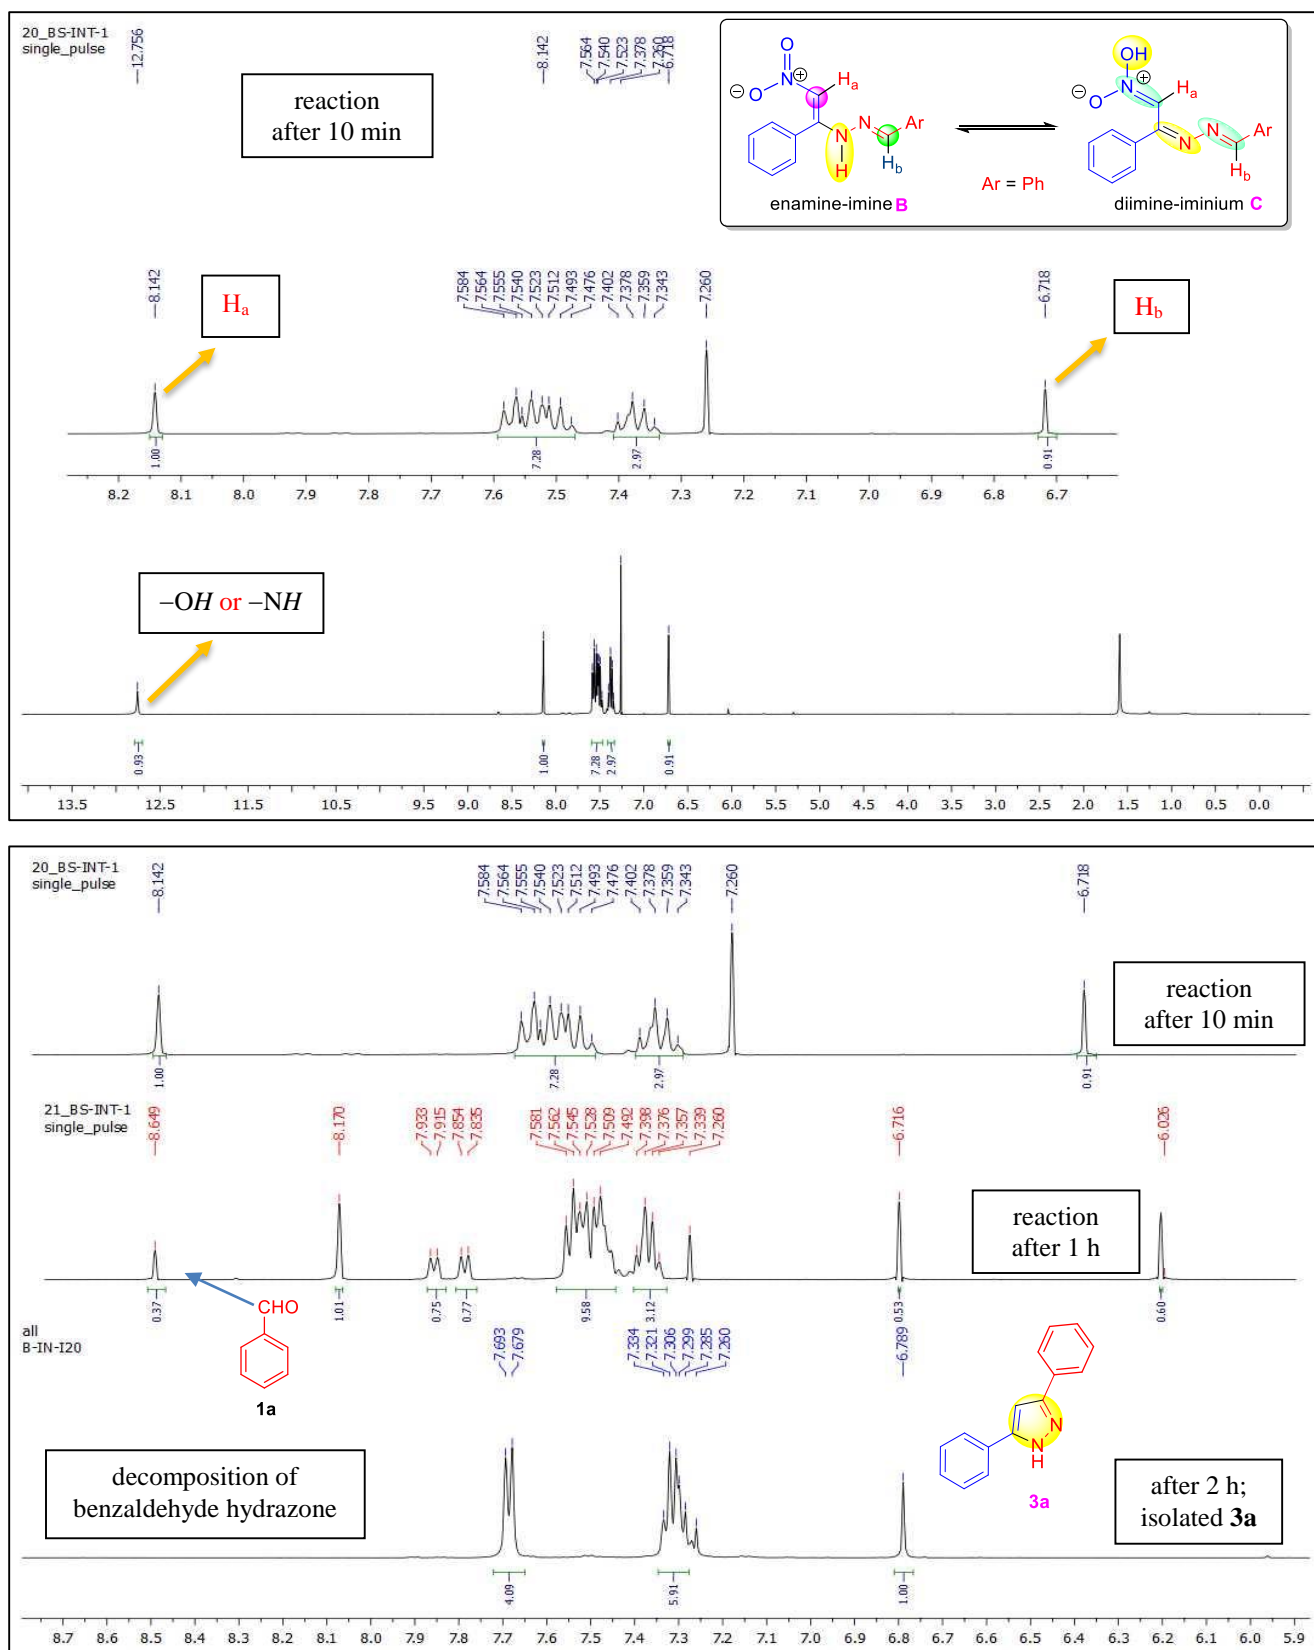

Figure S2. Monitoring reaction of **1a** and **2a** by  $^1\text{H}$  NMR analysis.

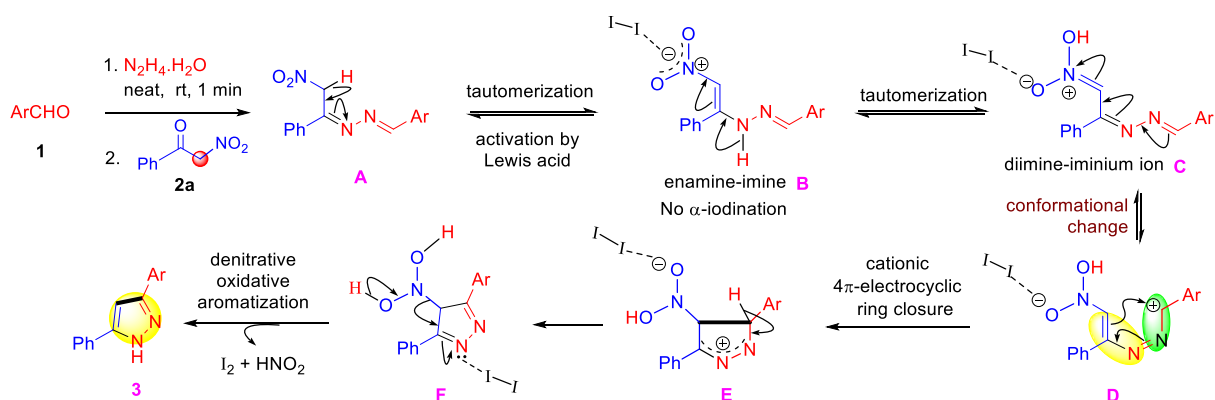

**Scheme S1:** Plausible reaction mechanism.

### Prototropic tautomers:

The NMR spectra of the products **3b** & **4a** are identical. Similarly, each product of the other two sets **3c** & **5a**, **4c** & **5b** have identical spectral data. This indicates that most likely, the proton in the pyrazole ring is delocalized between the two nitrogen atoms of the heterocycle. Though the position of the proton in the pyrazole ring is shown in the structures on one nitrogen atom, in principle, it can be on either of the two nitrogen atoms due to prototropic tautomerism.

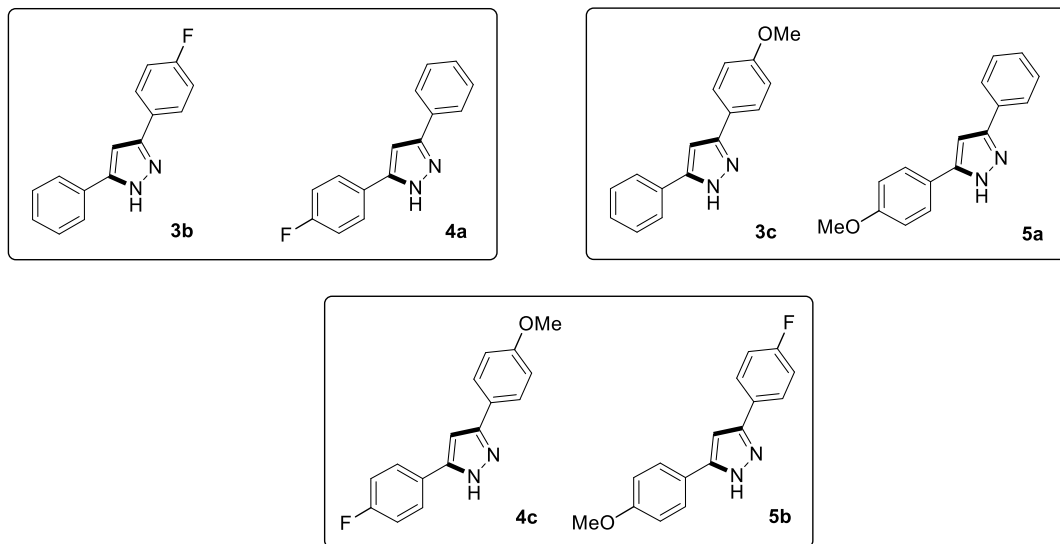

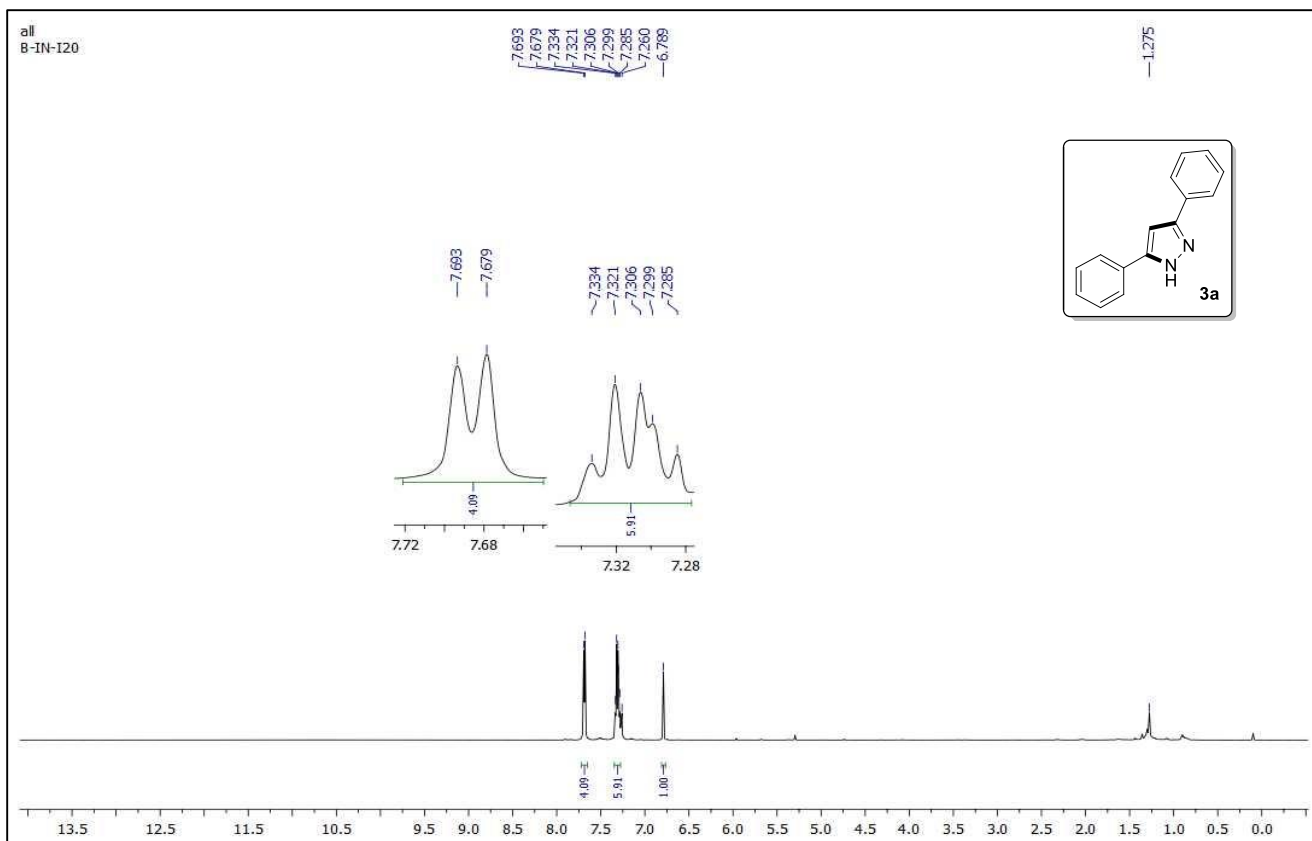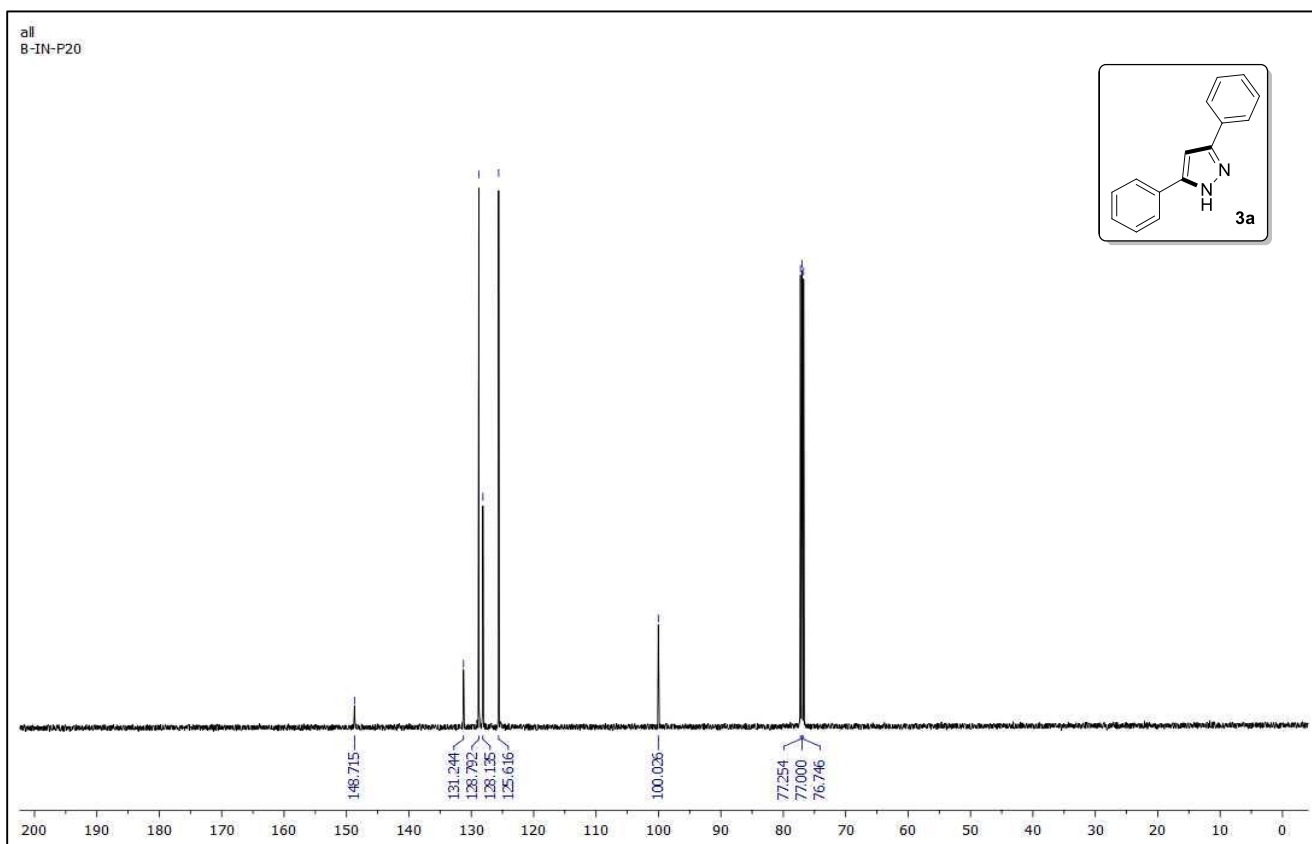

AV-400-20200122-155108-44932  
Ratan P

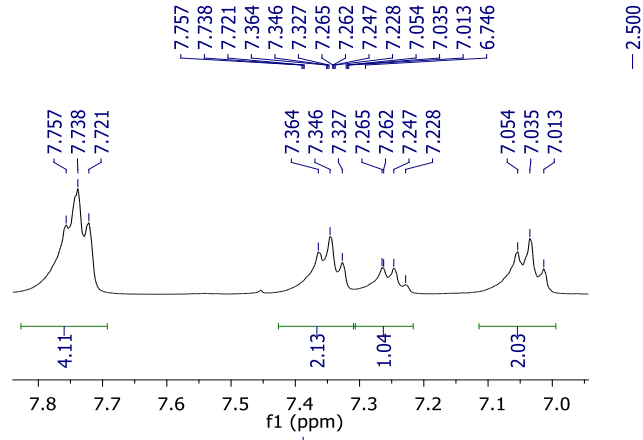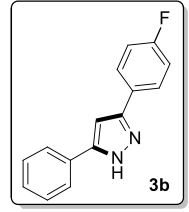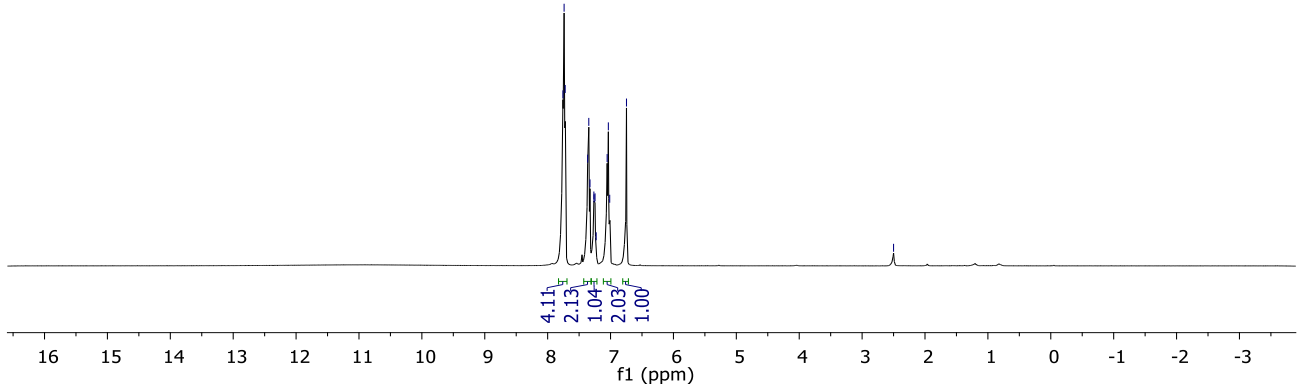

AV-400-20200122-155108-44932  
Ratan P

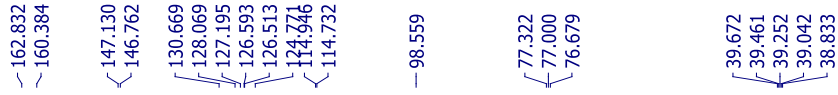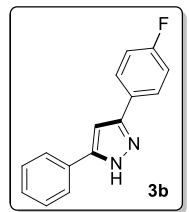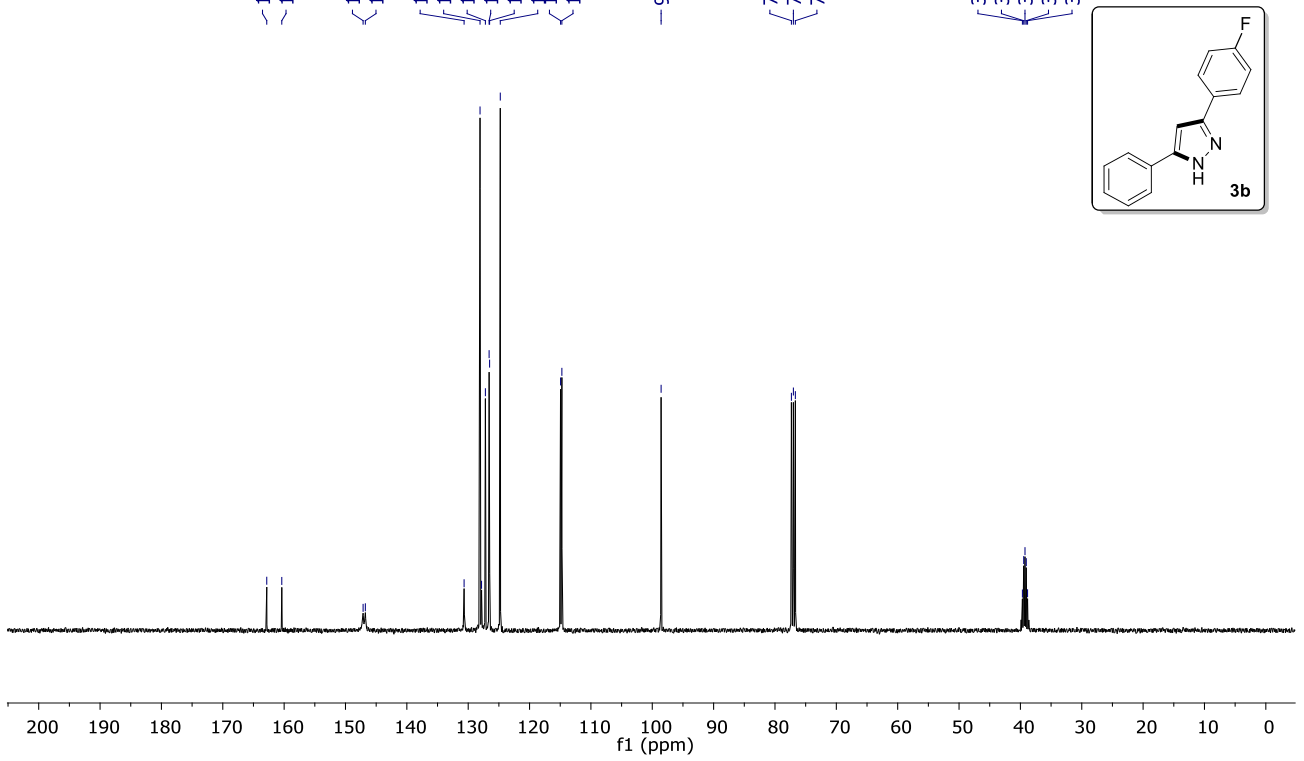

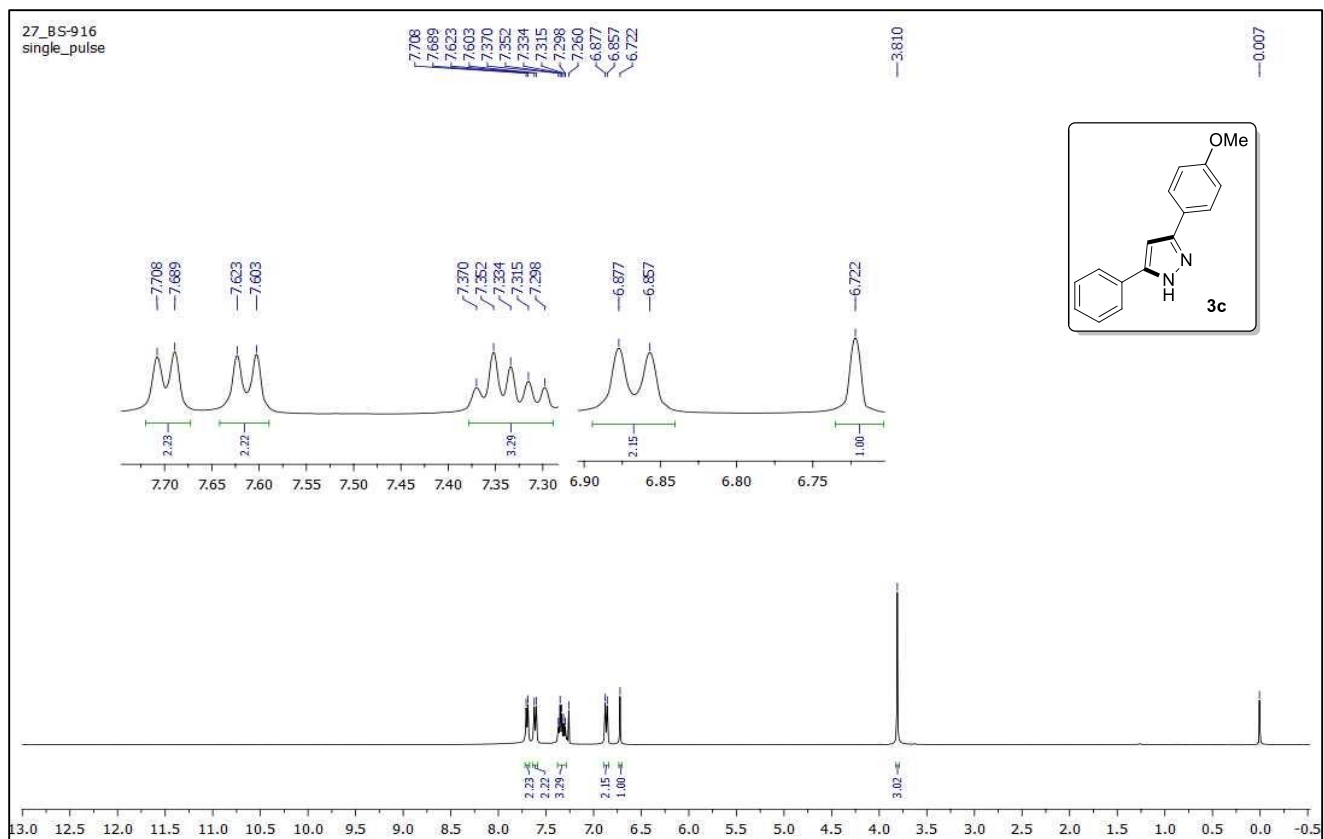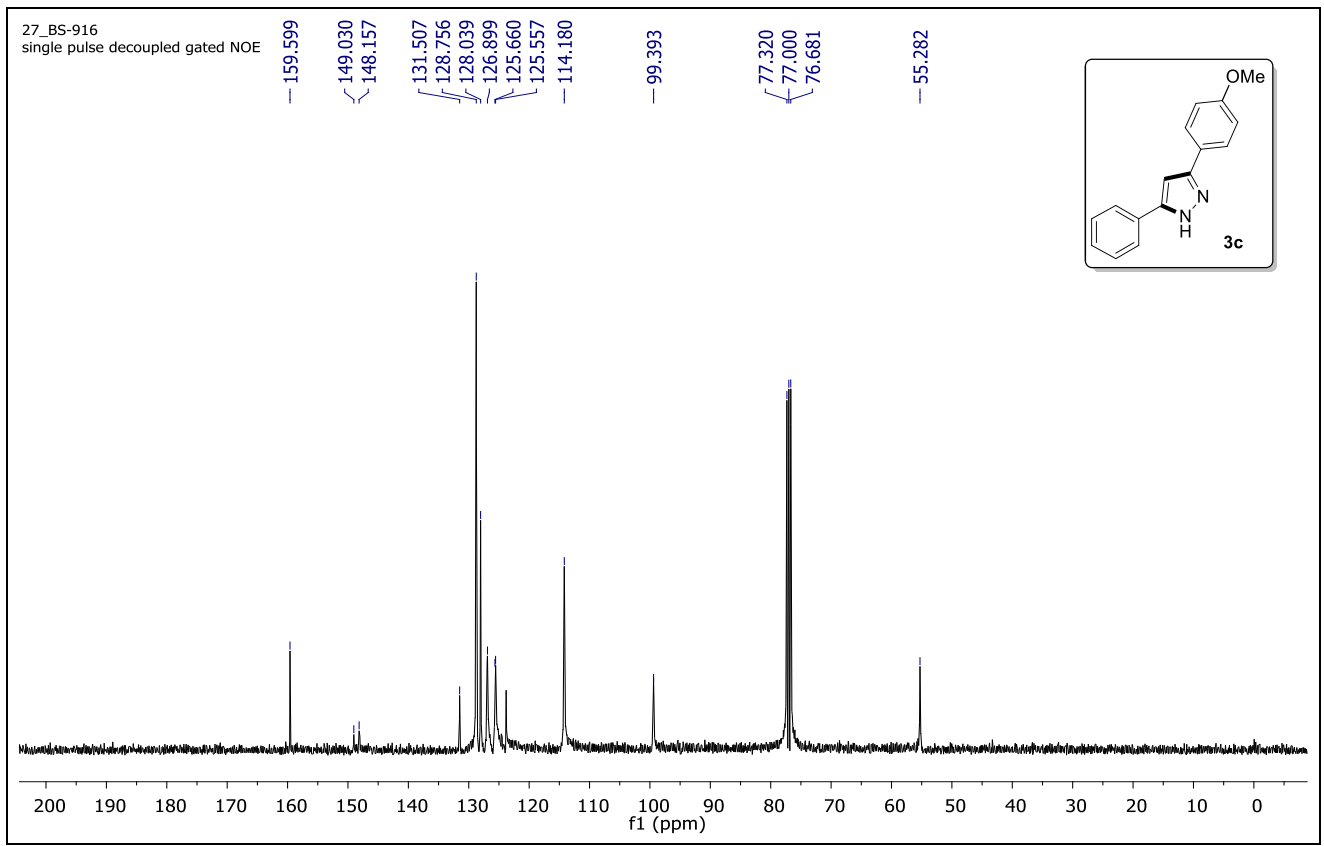

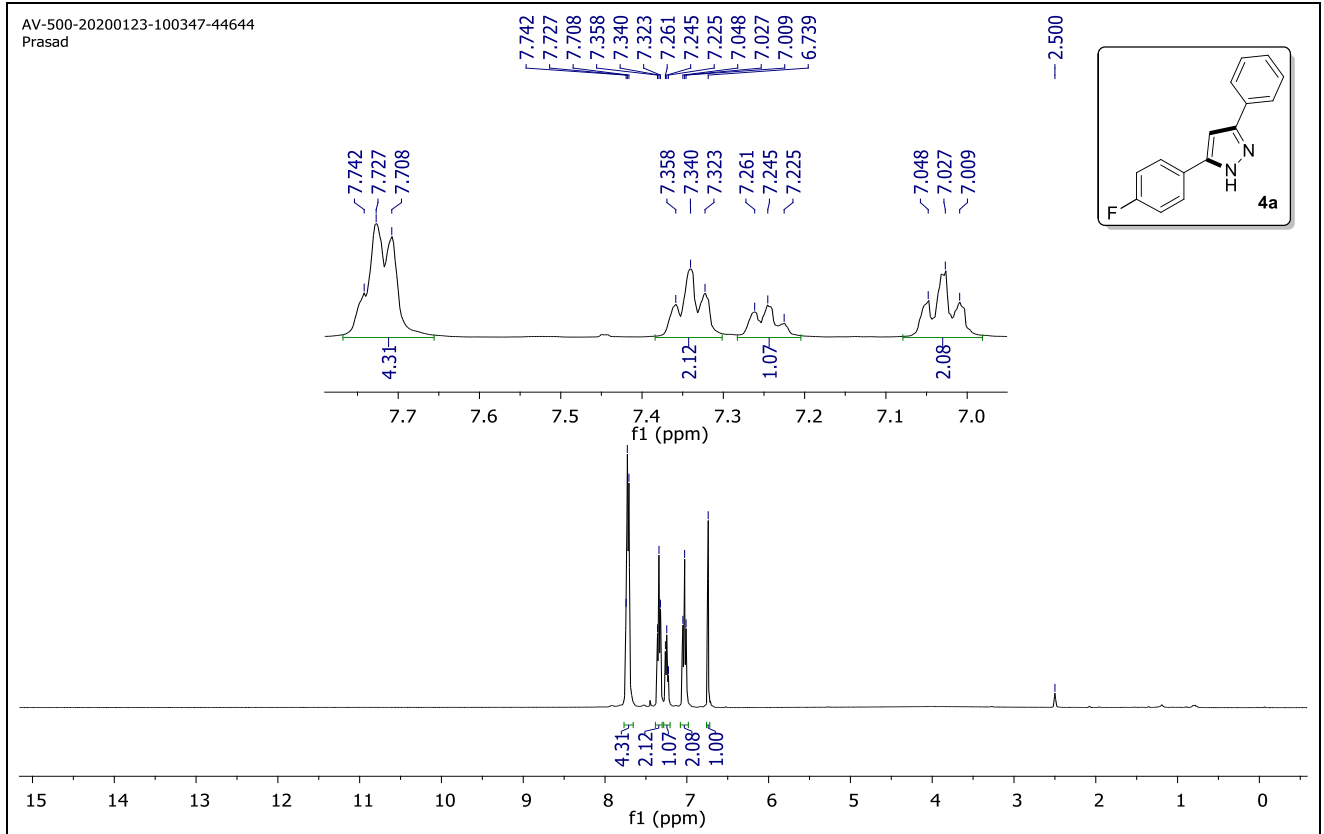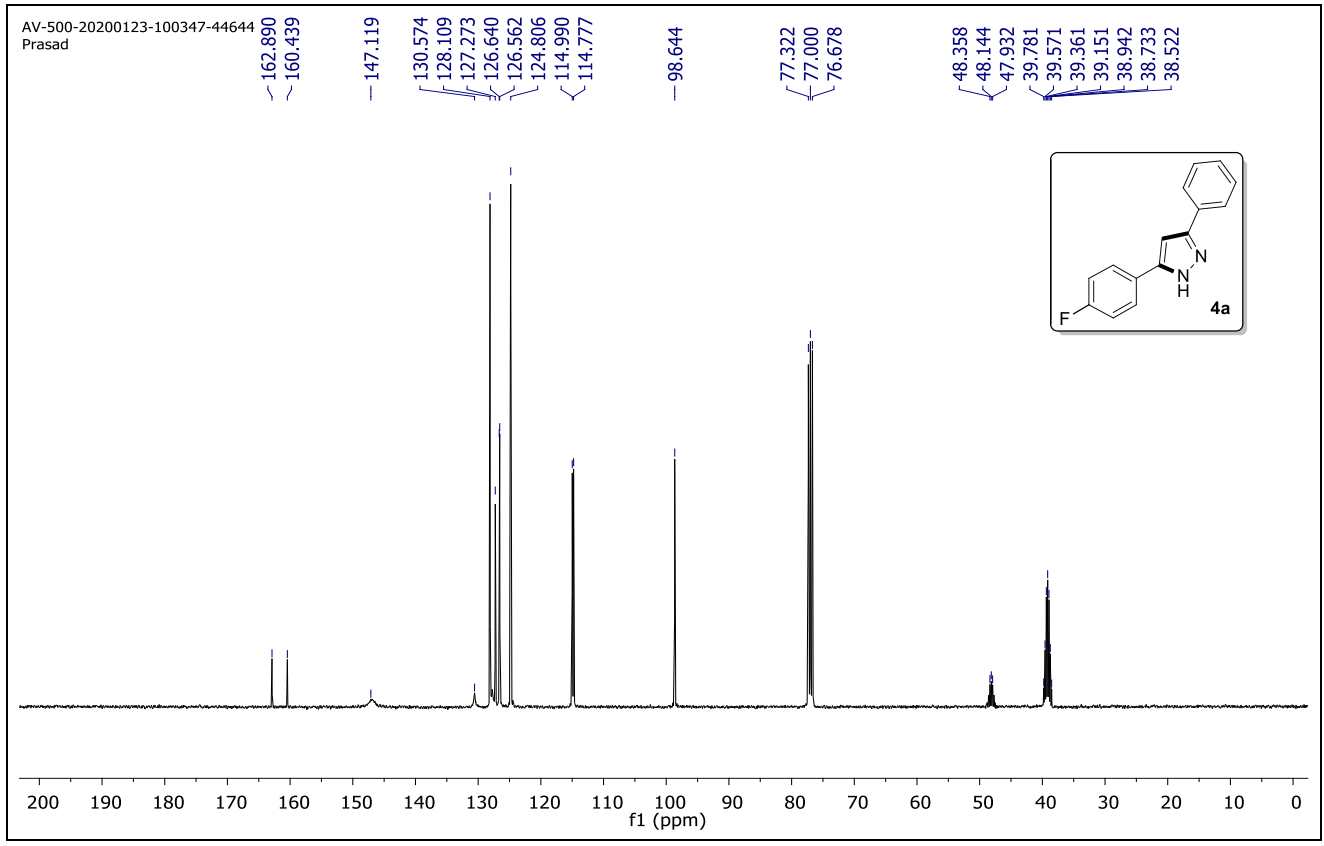



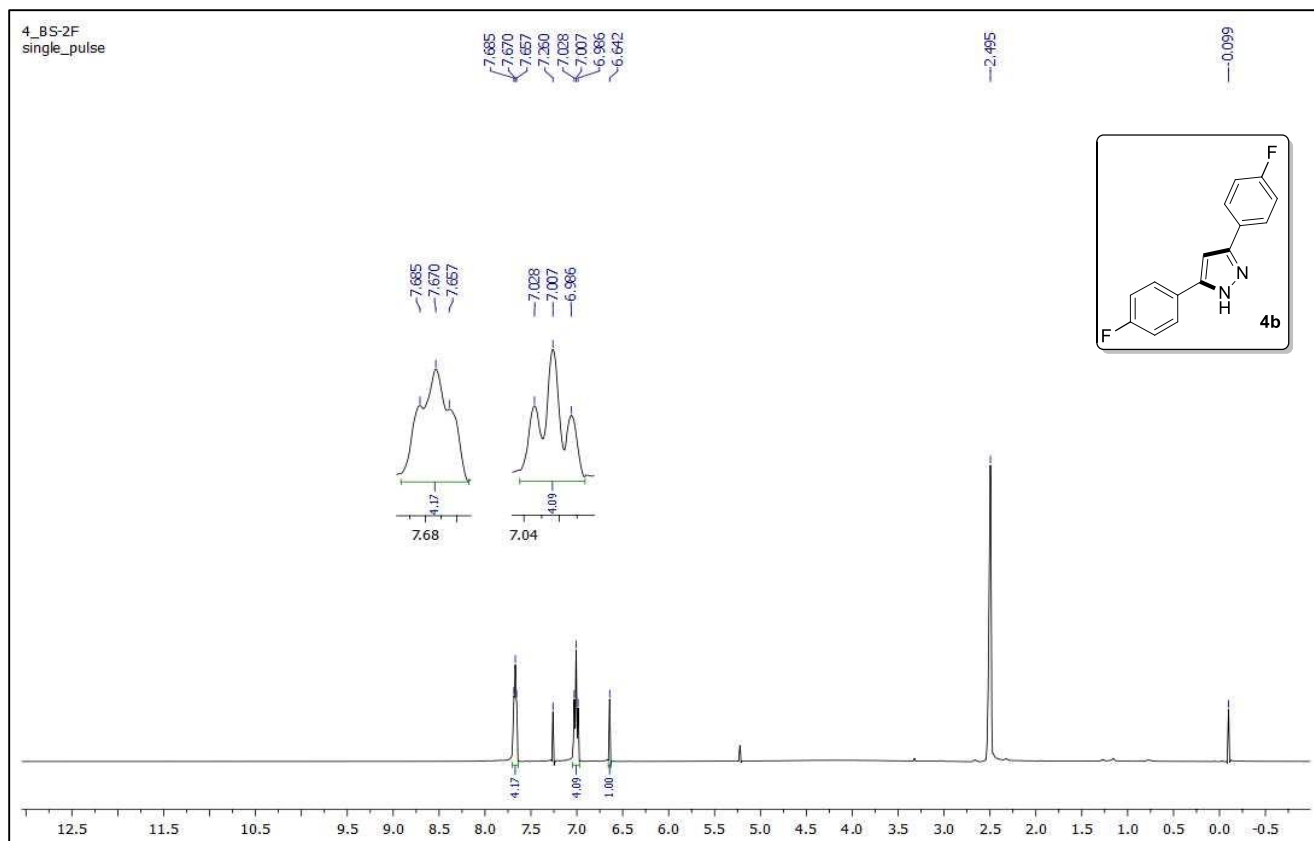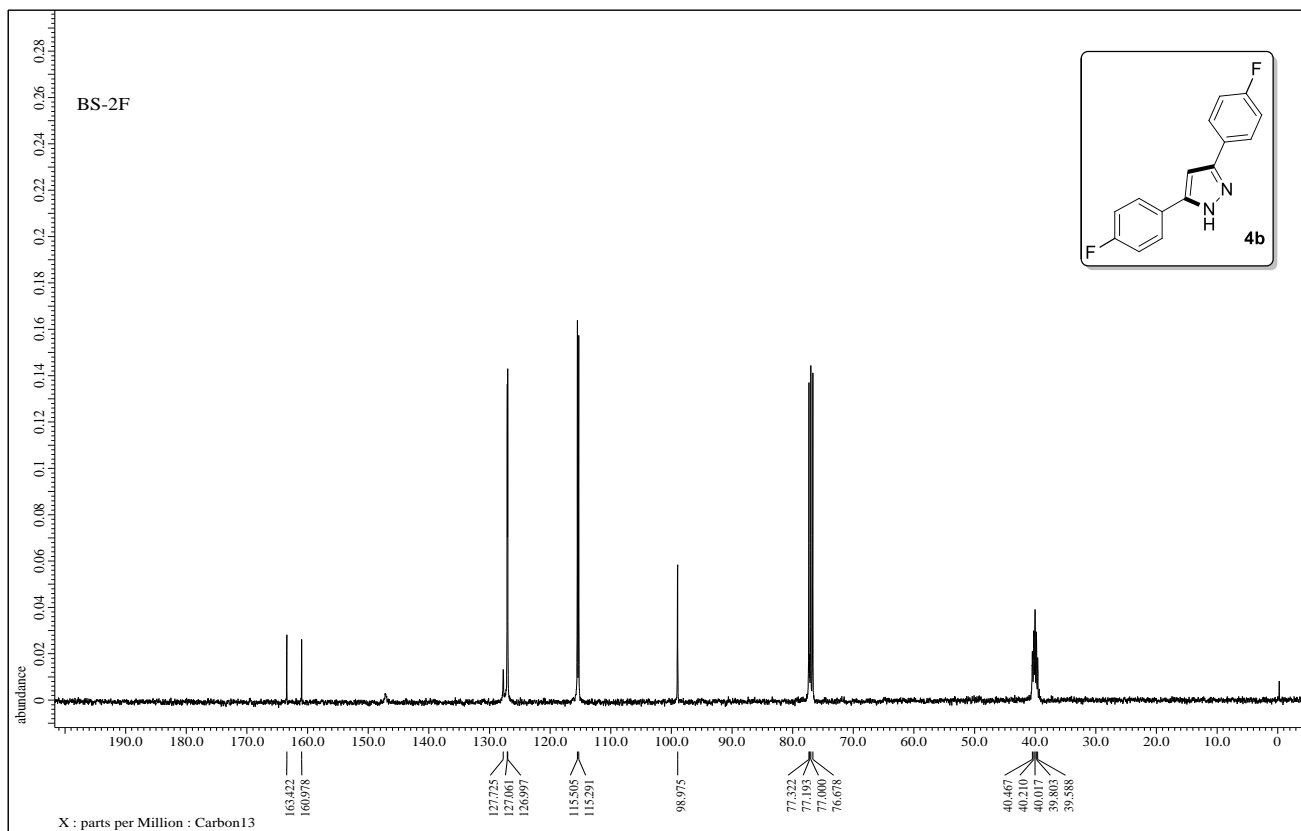

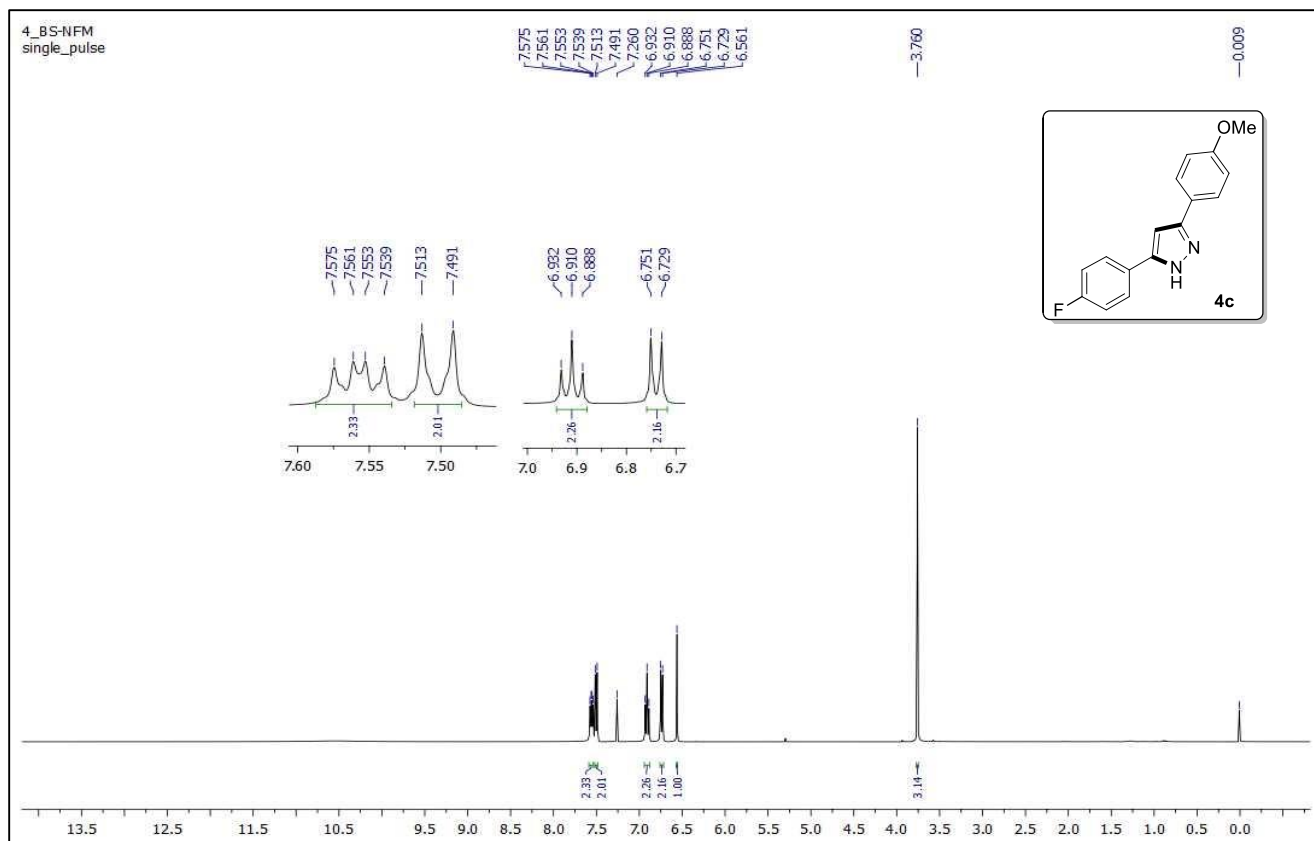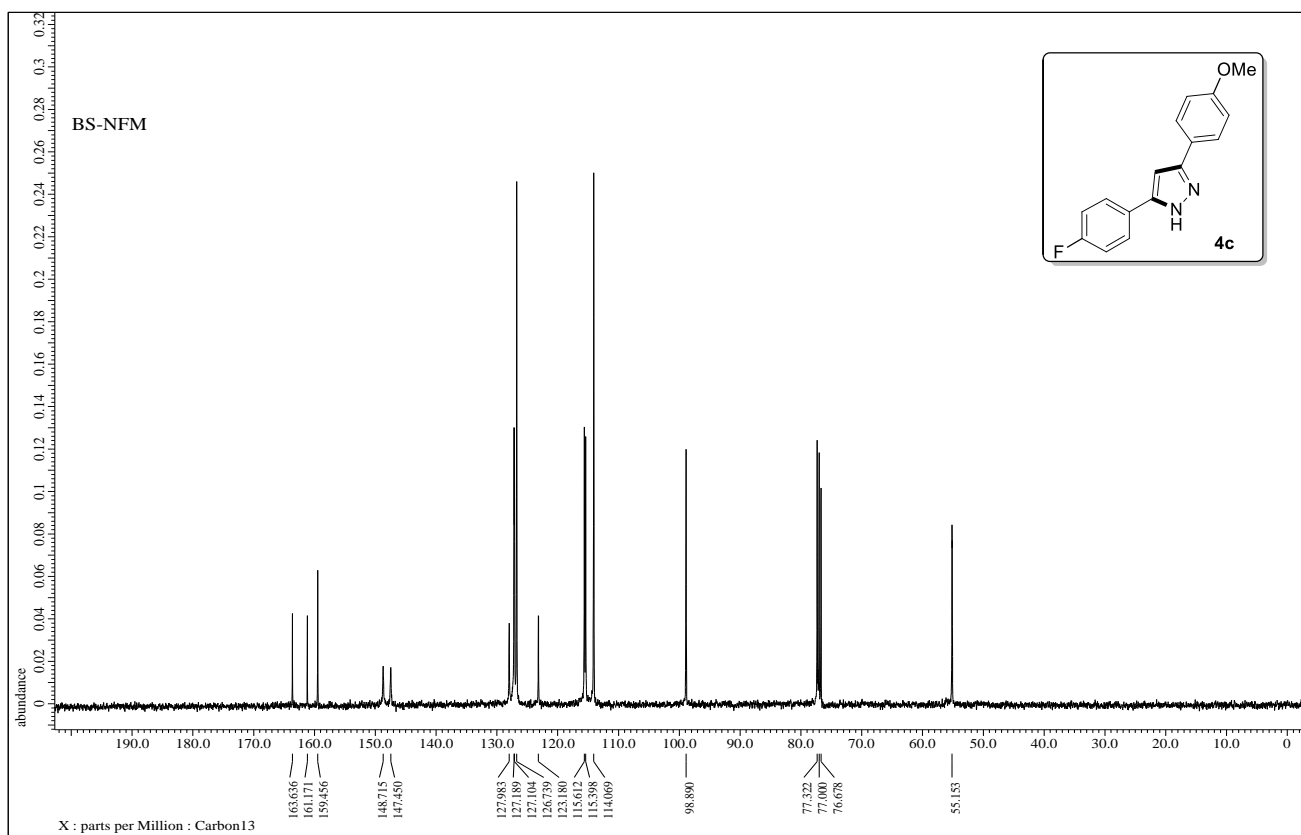

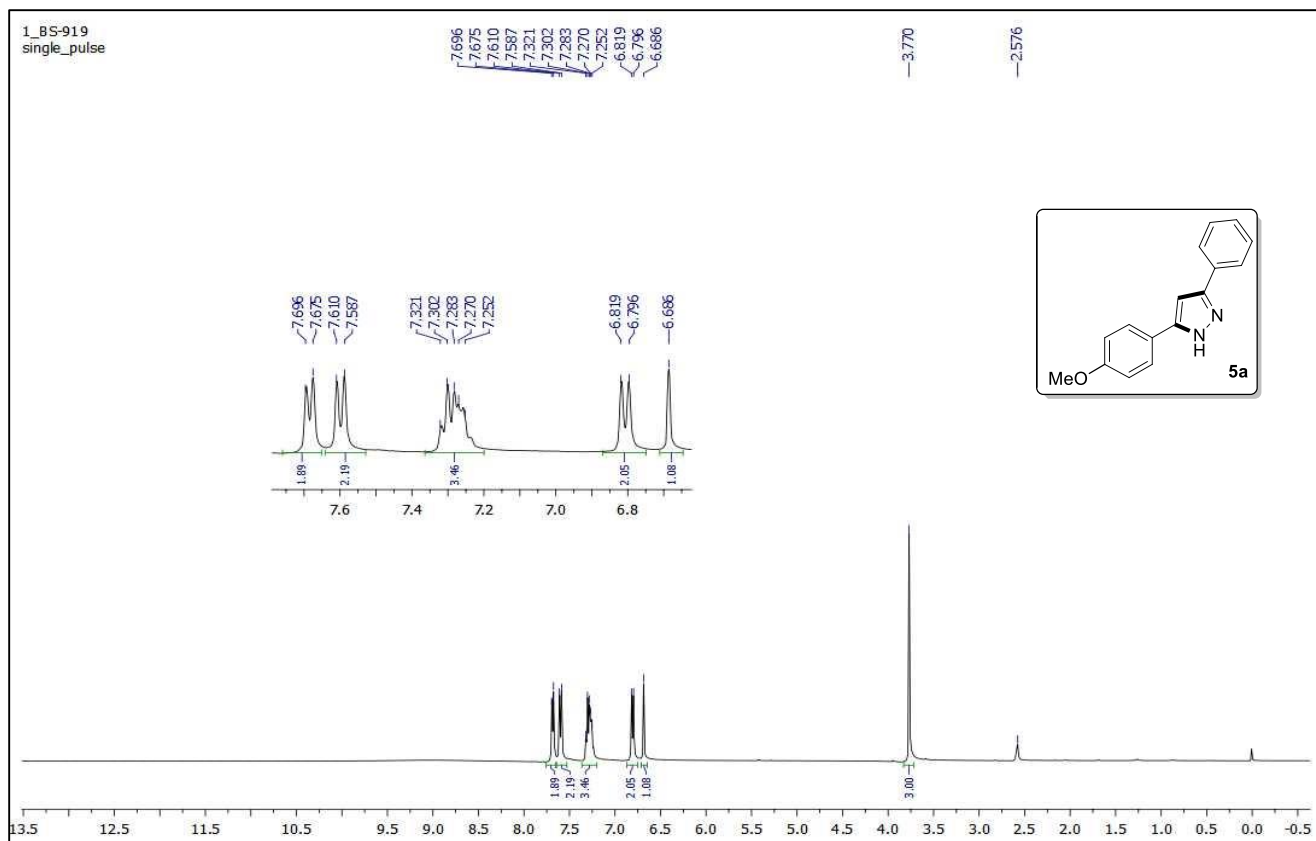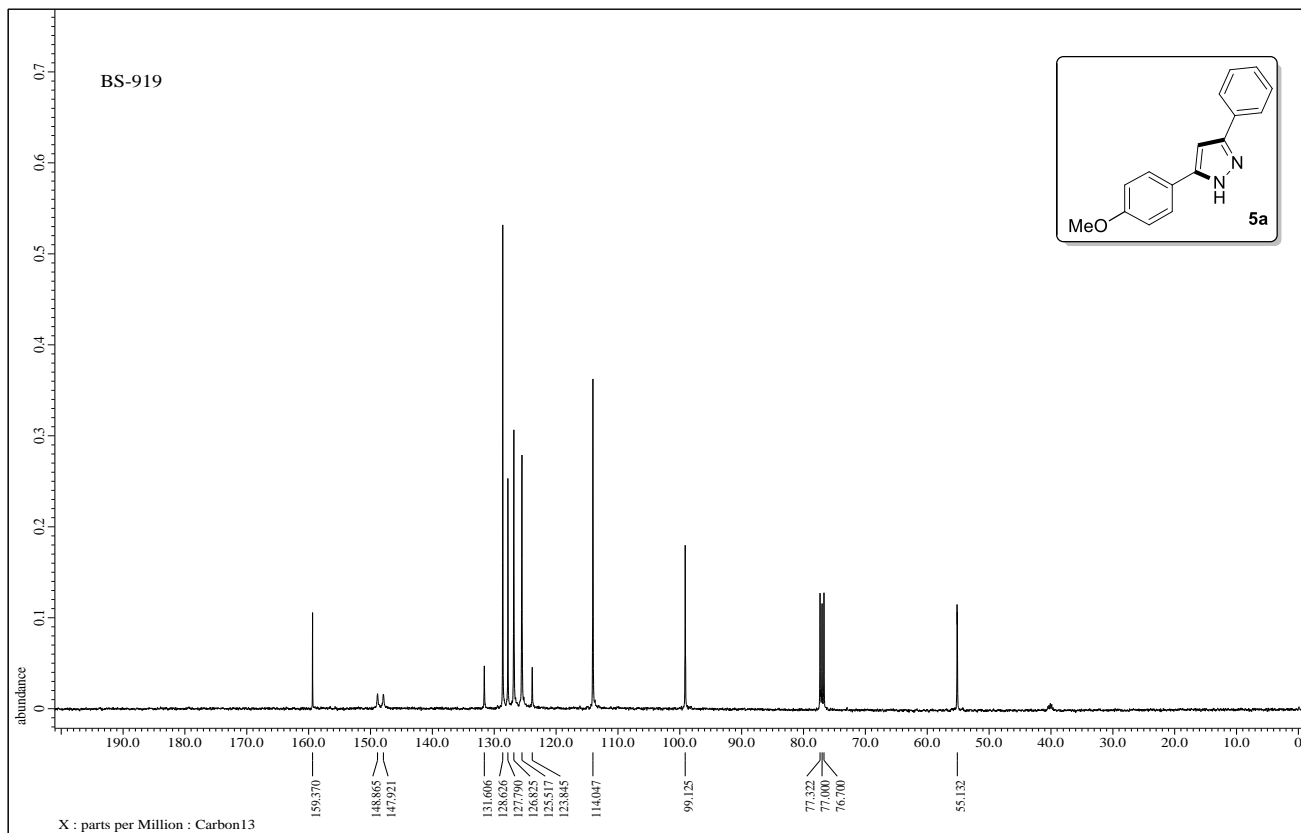

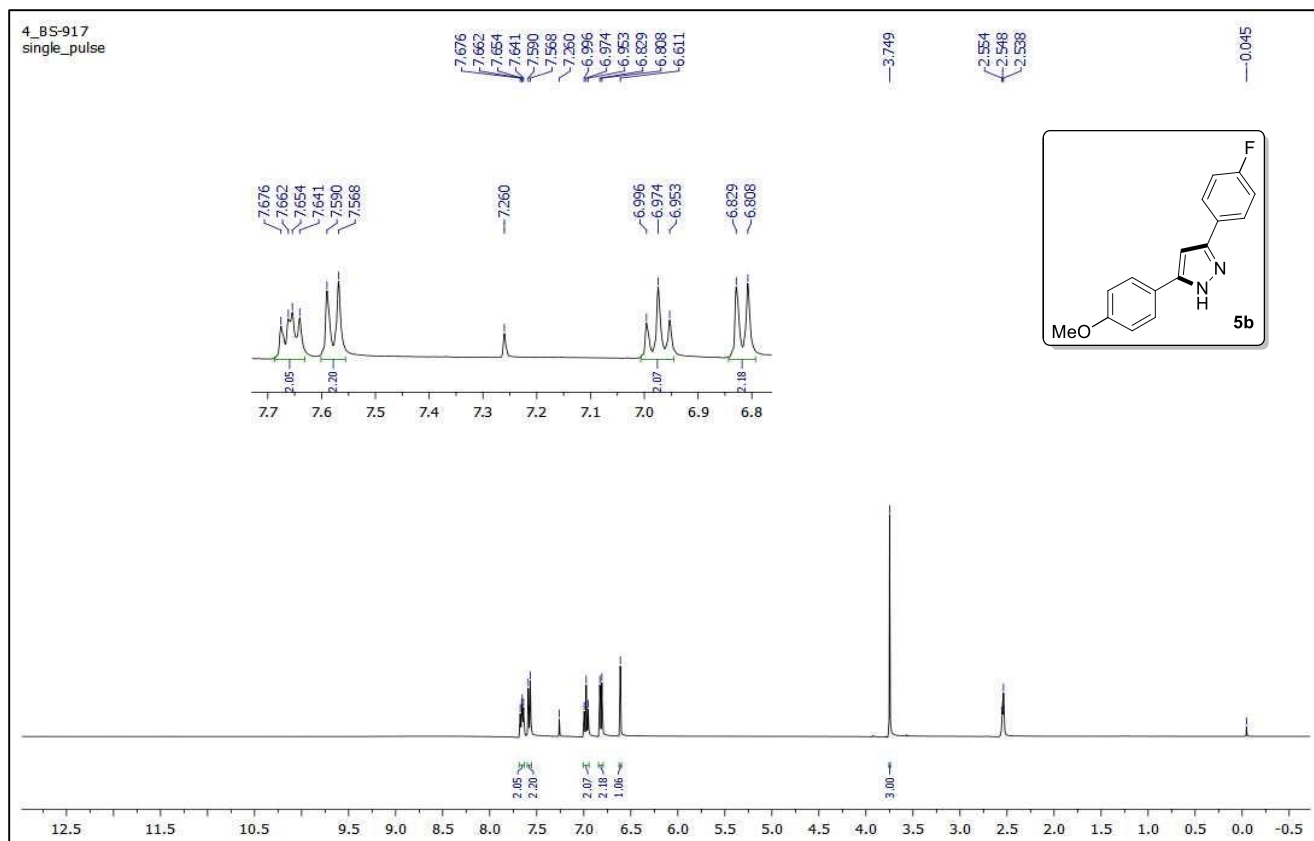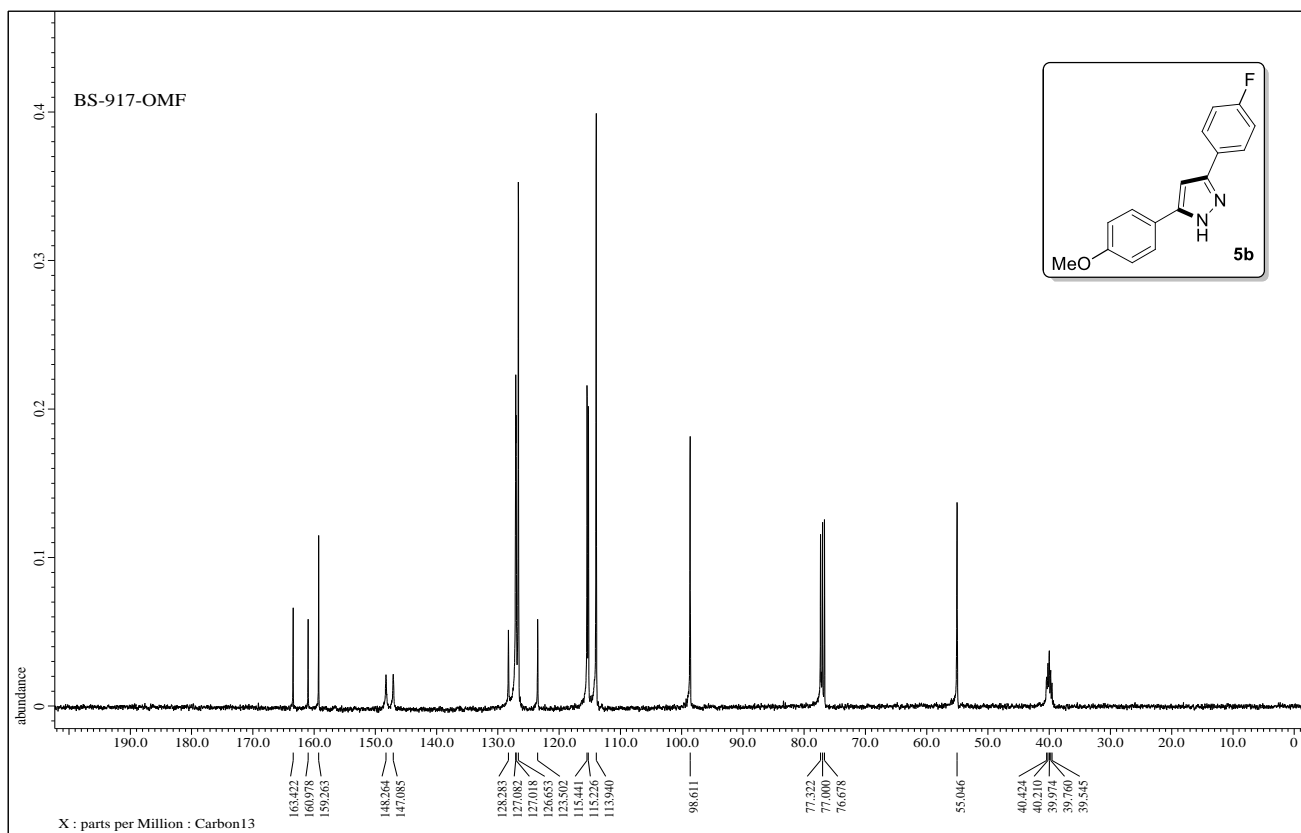

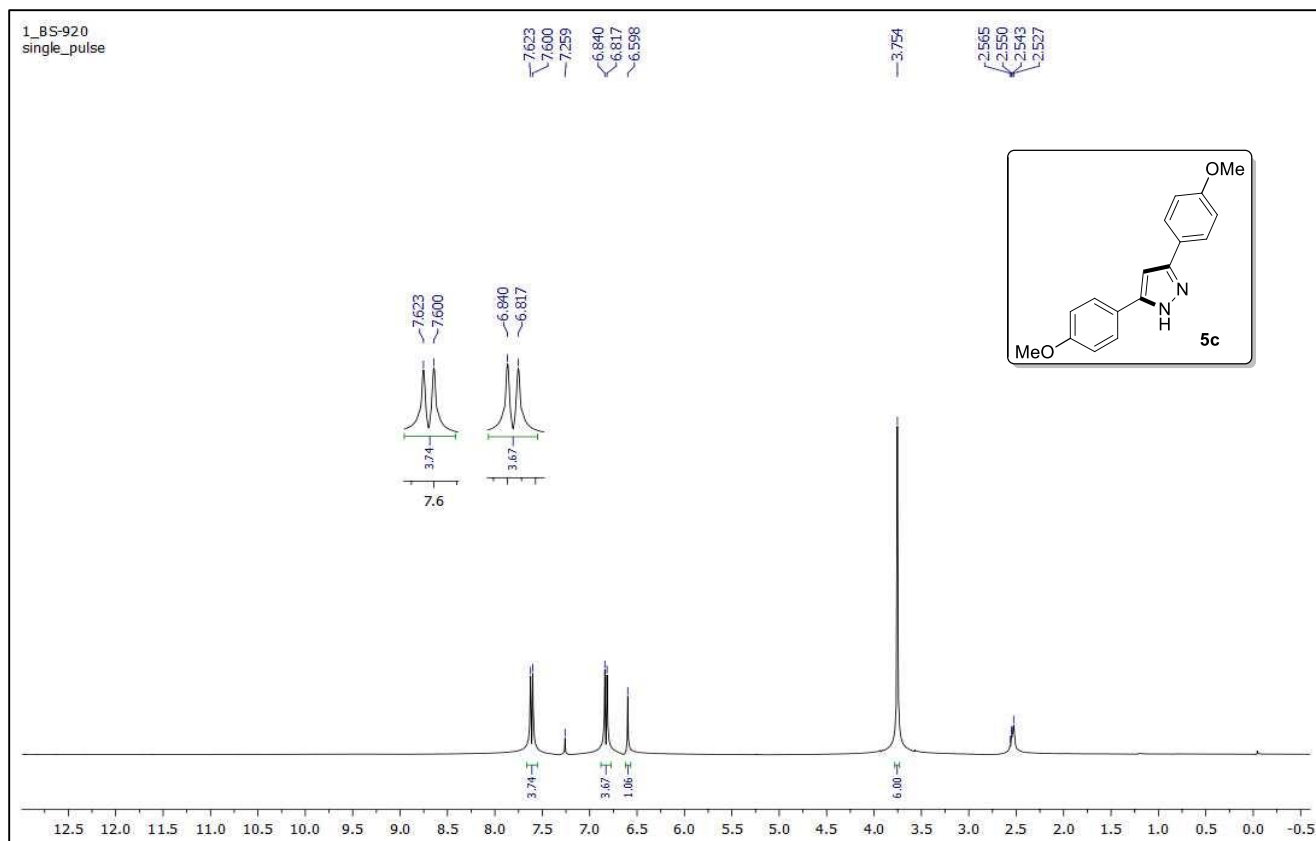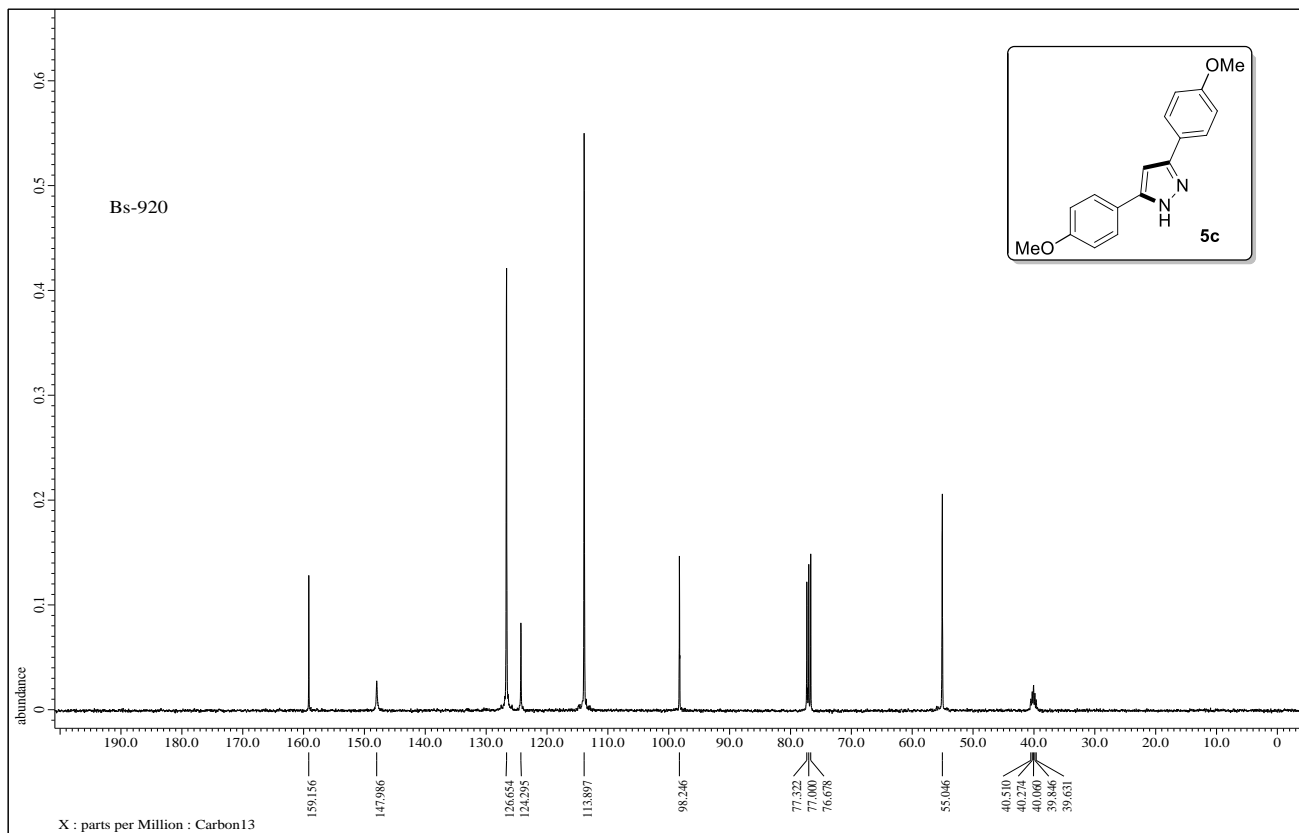

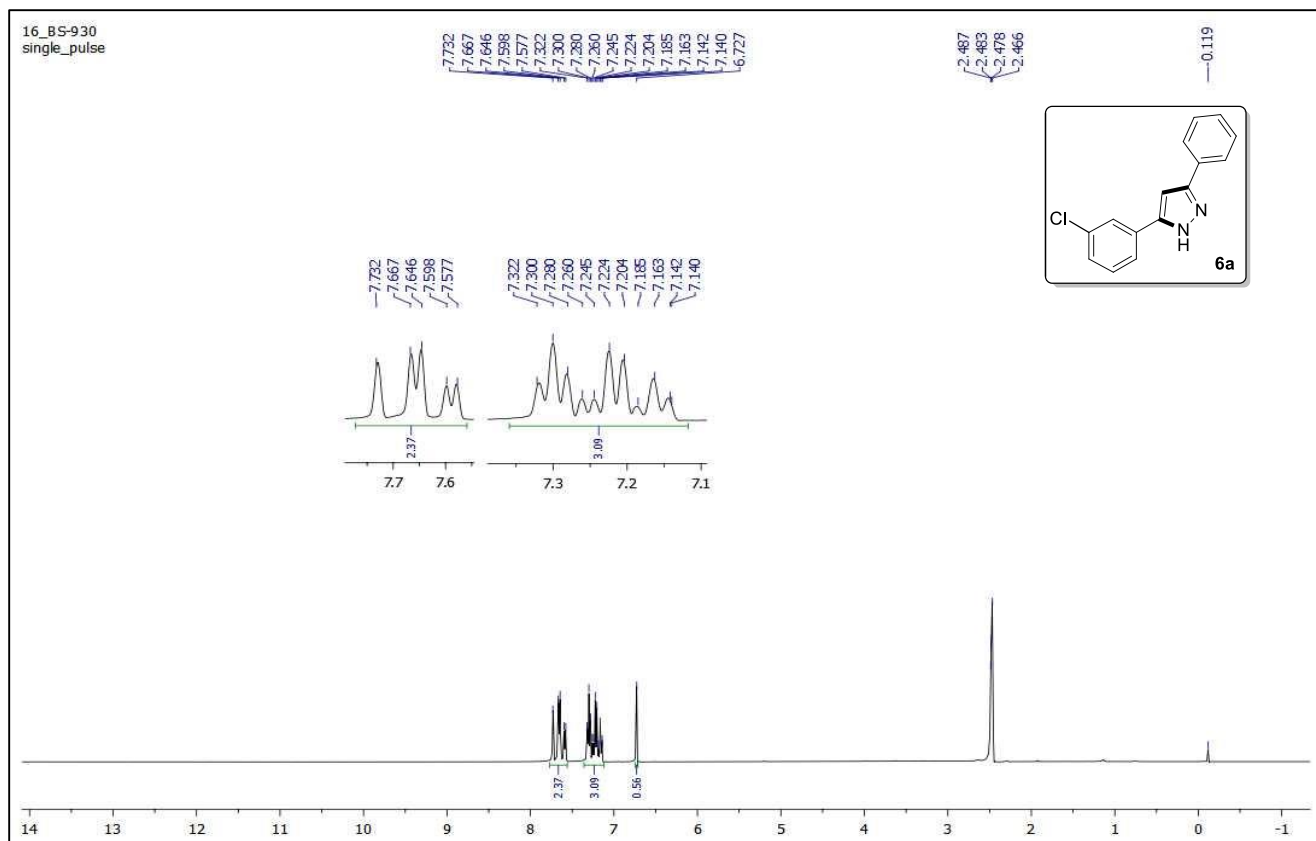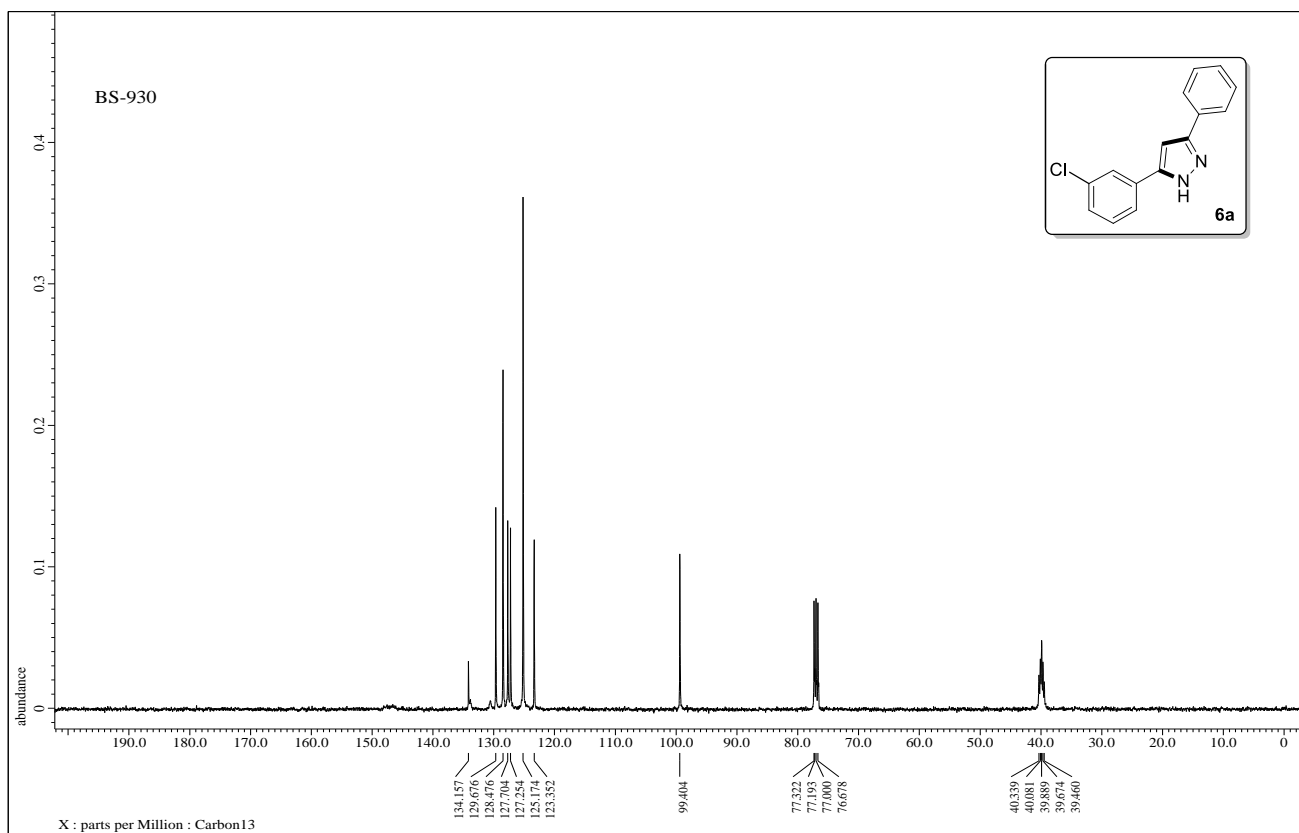

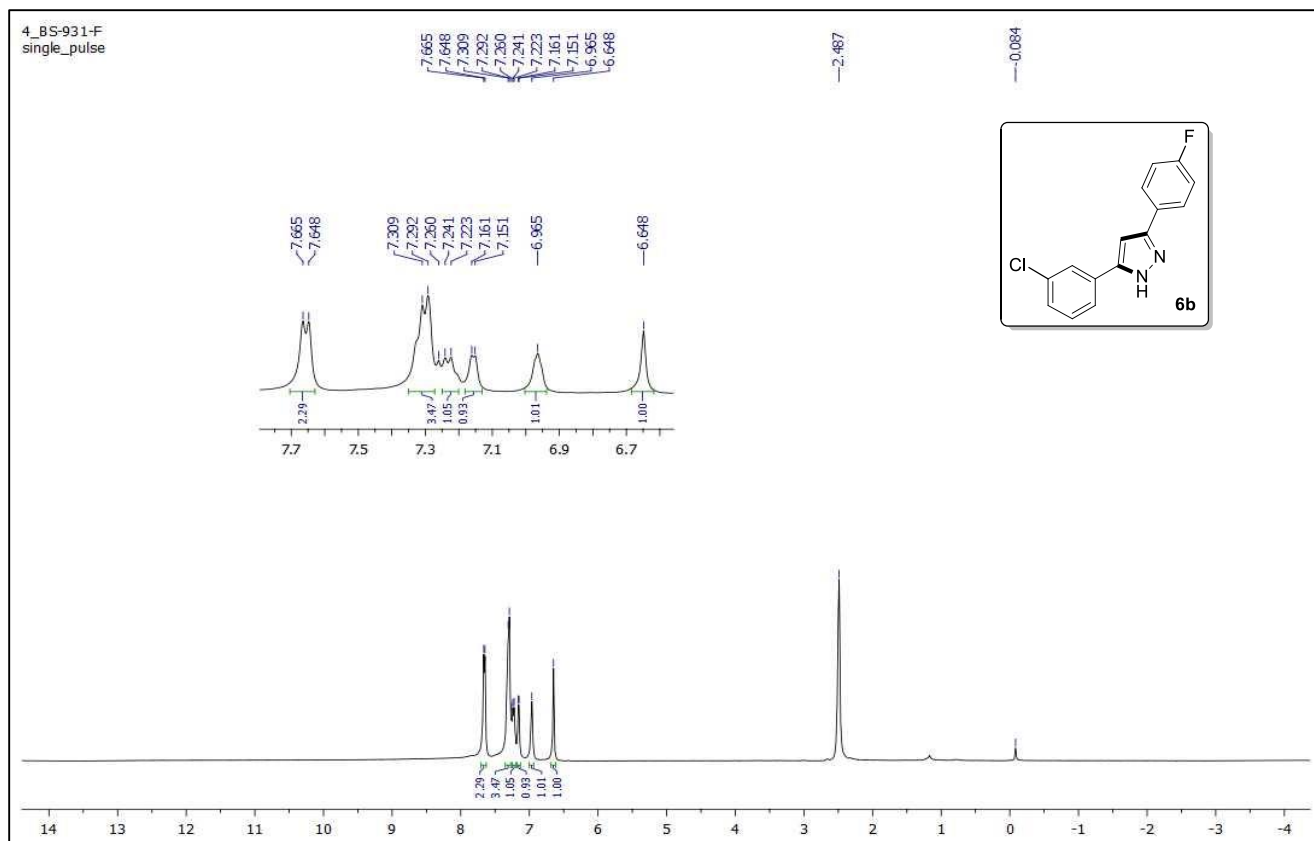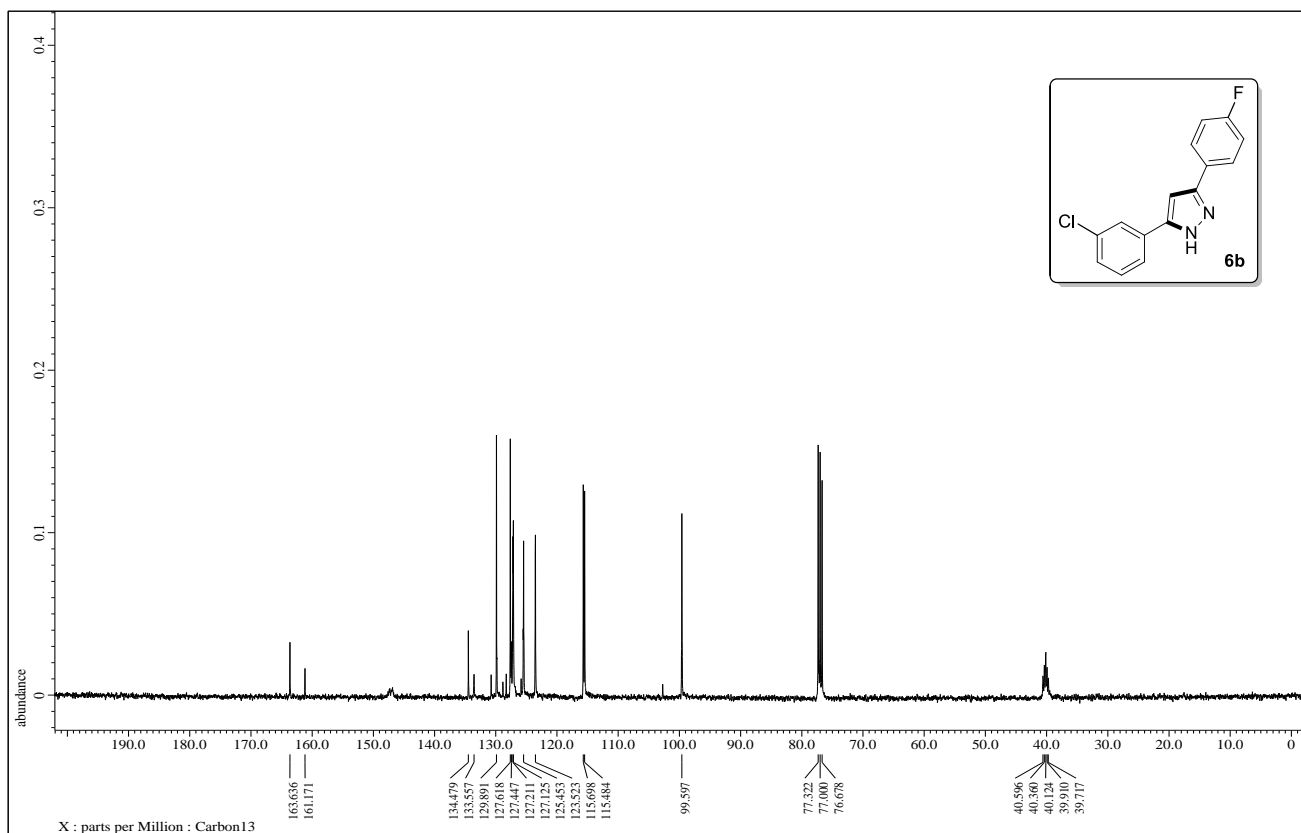

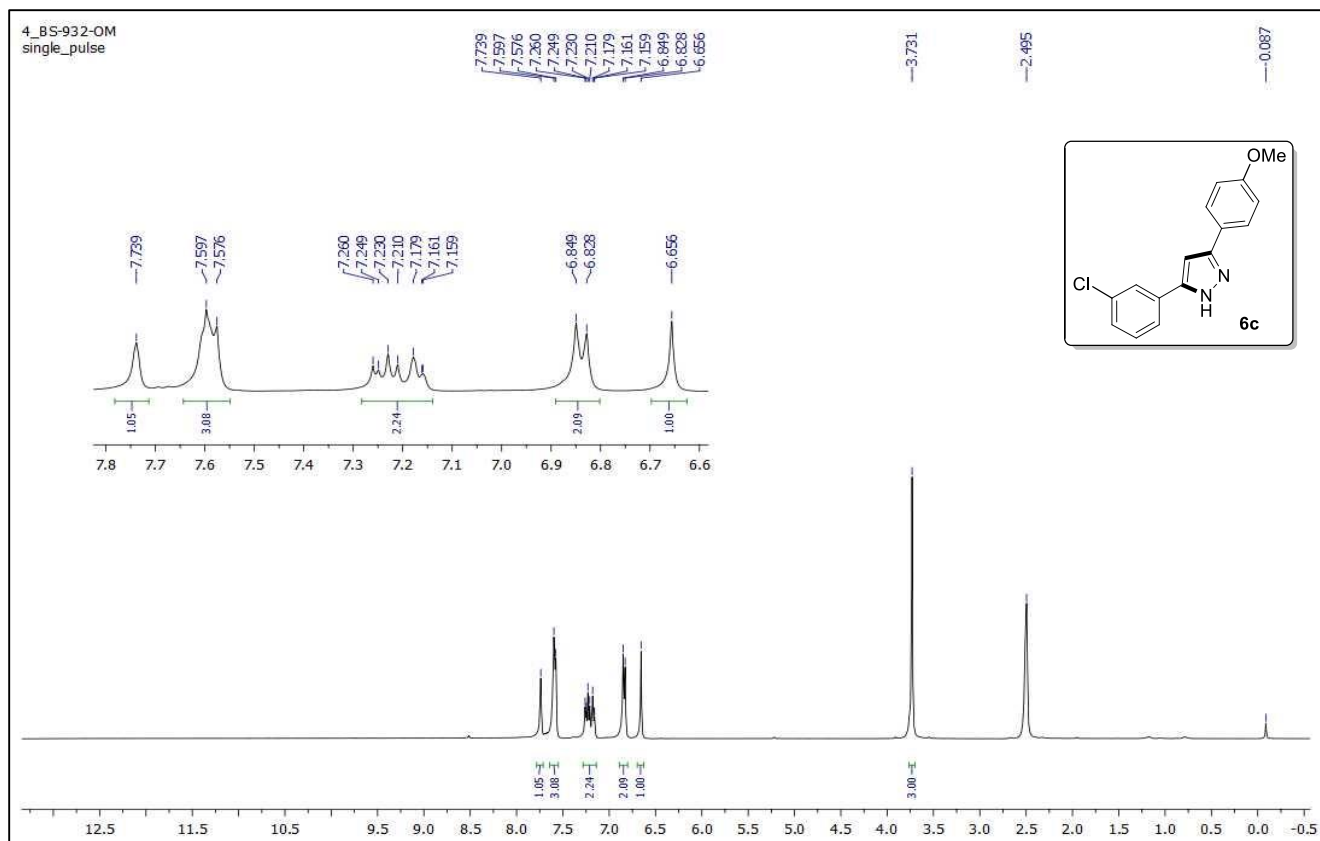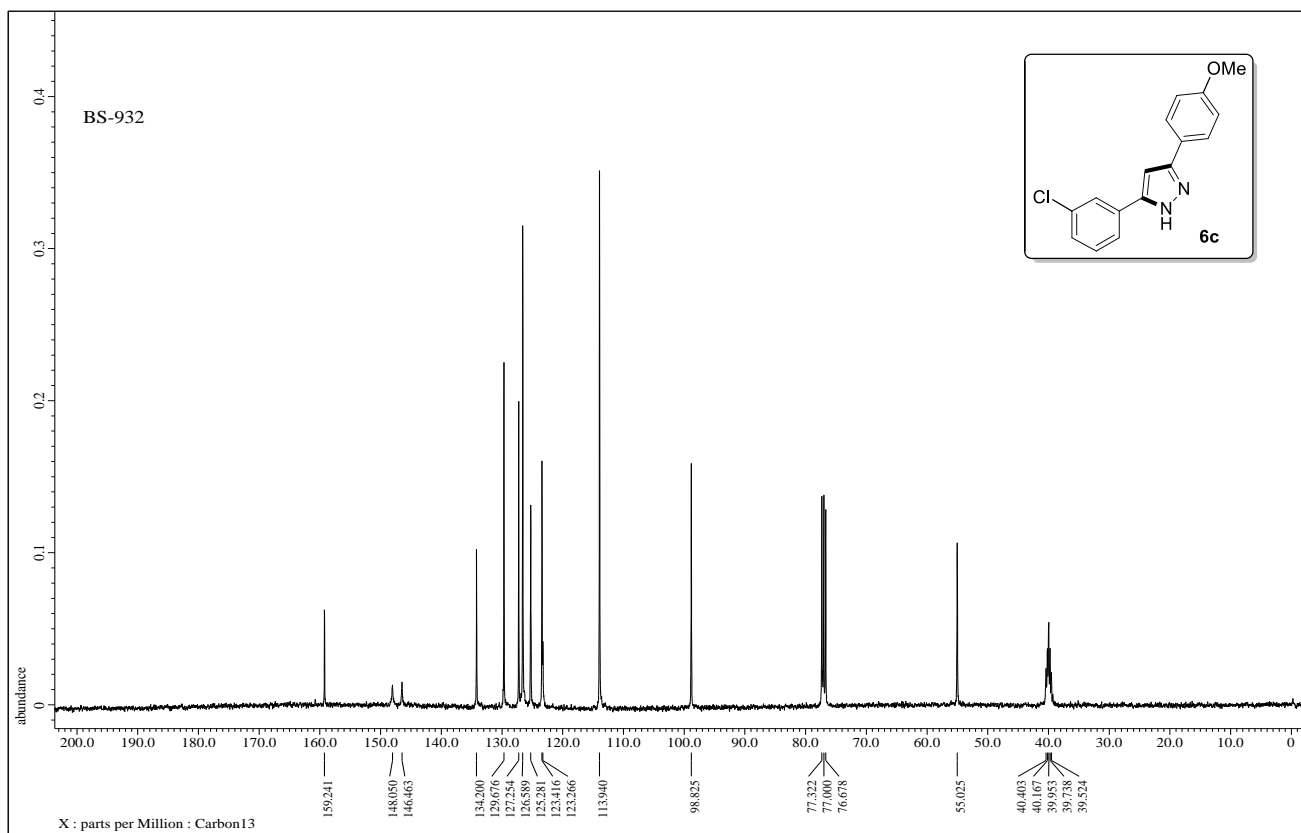



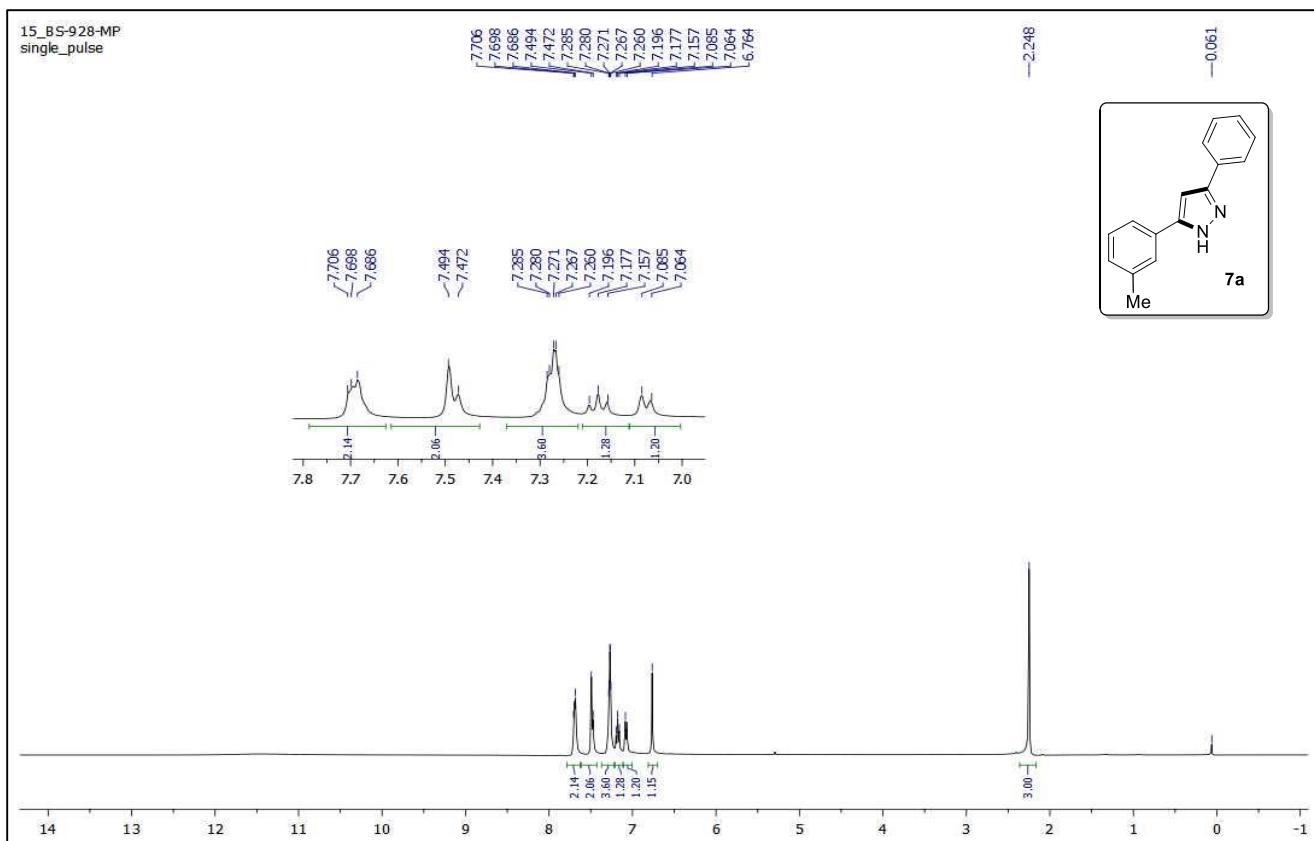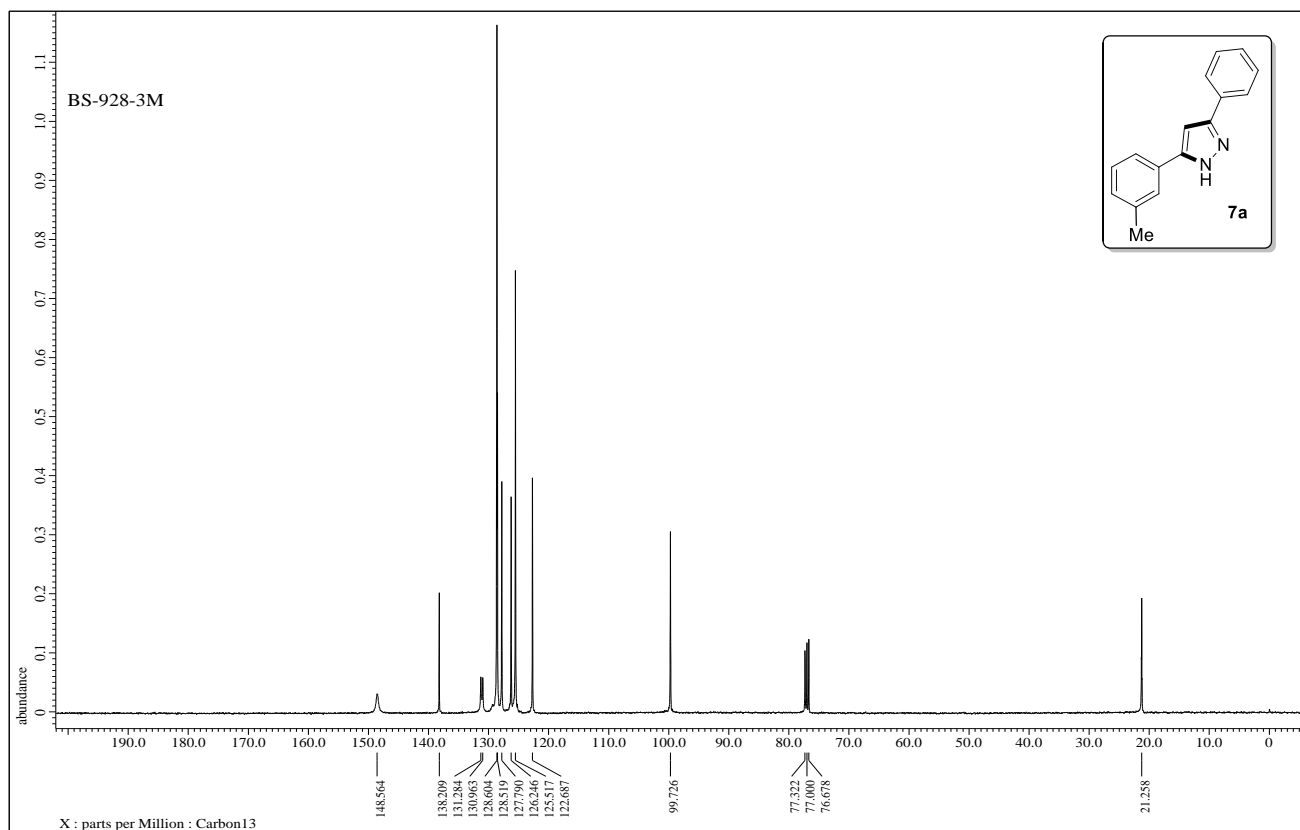

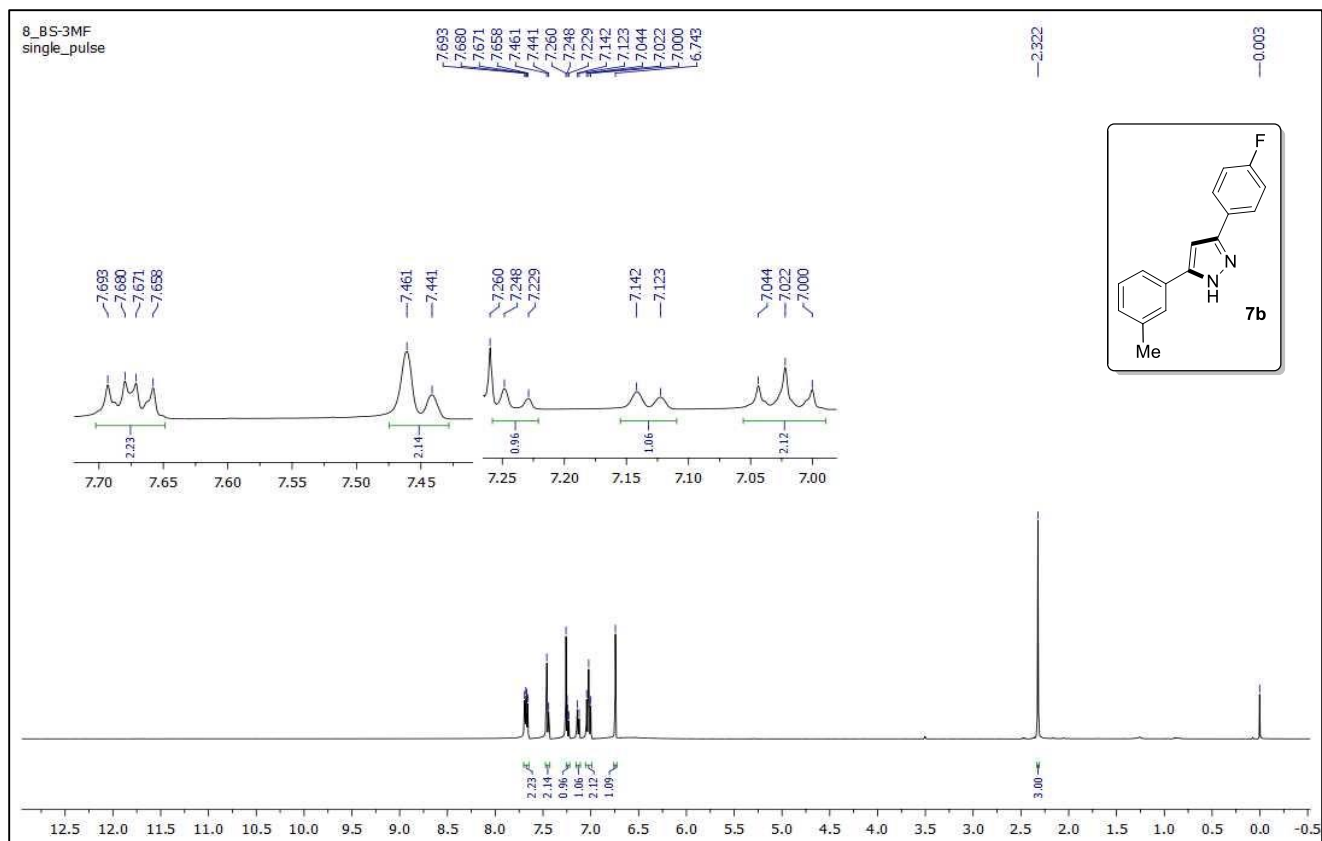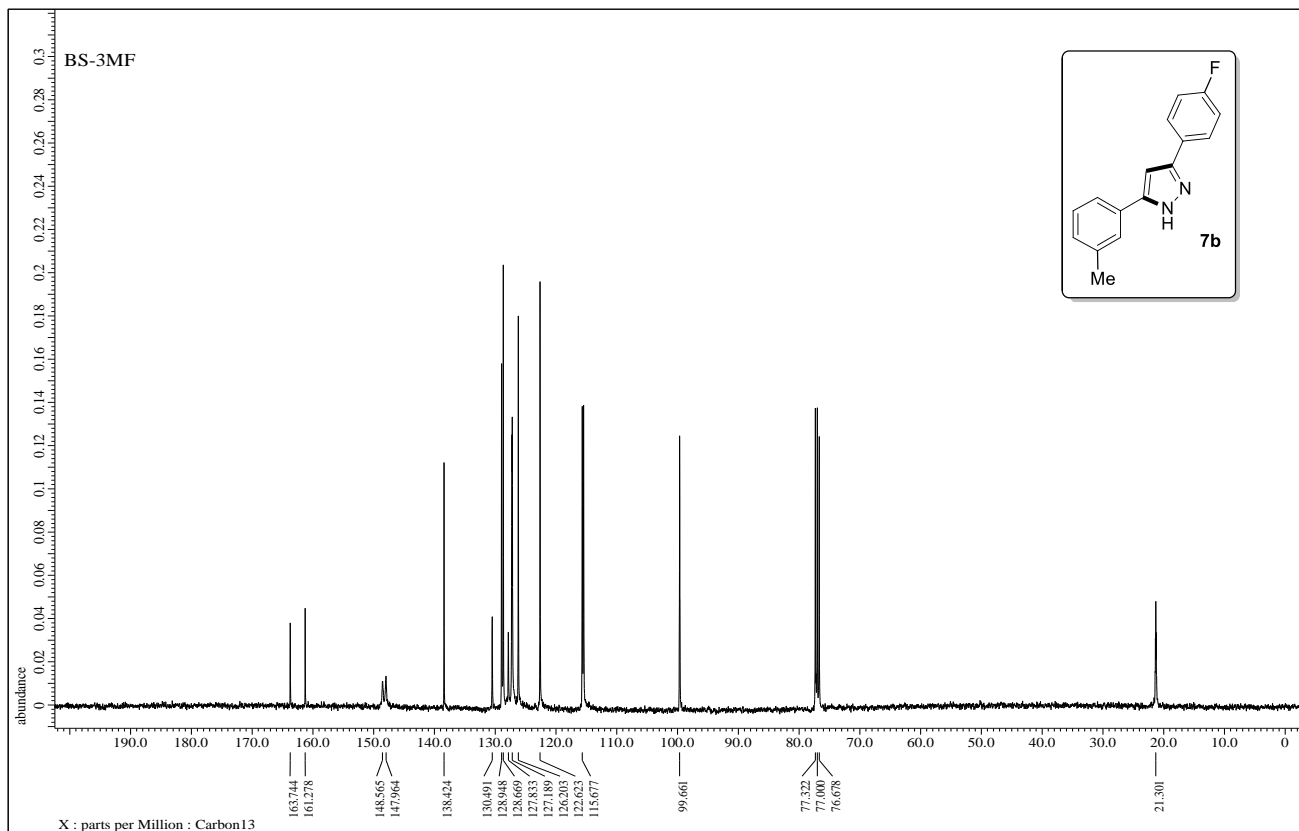

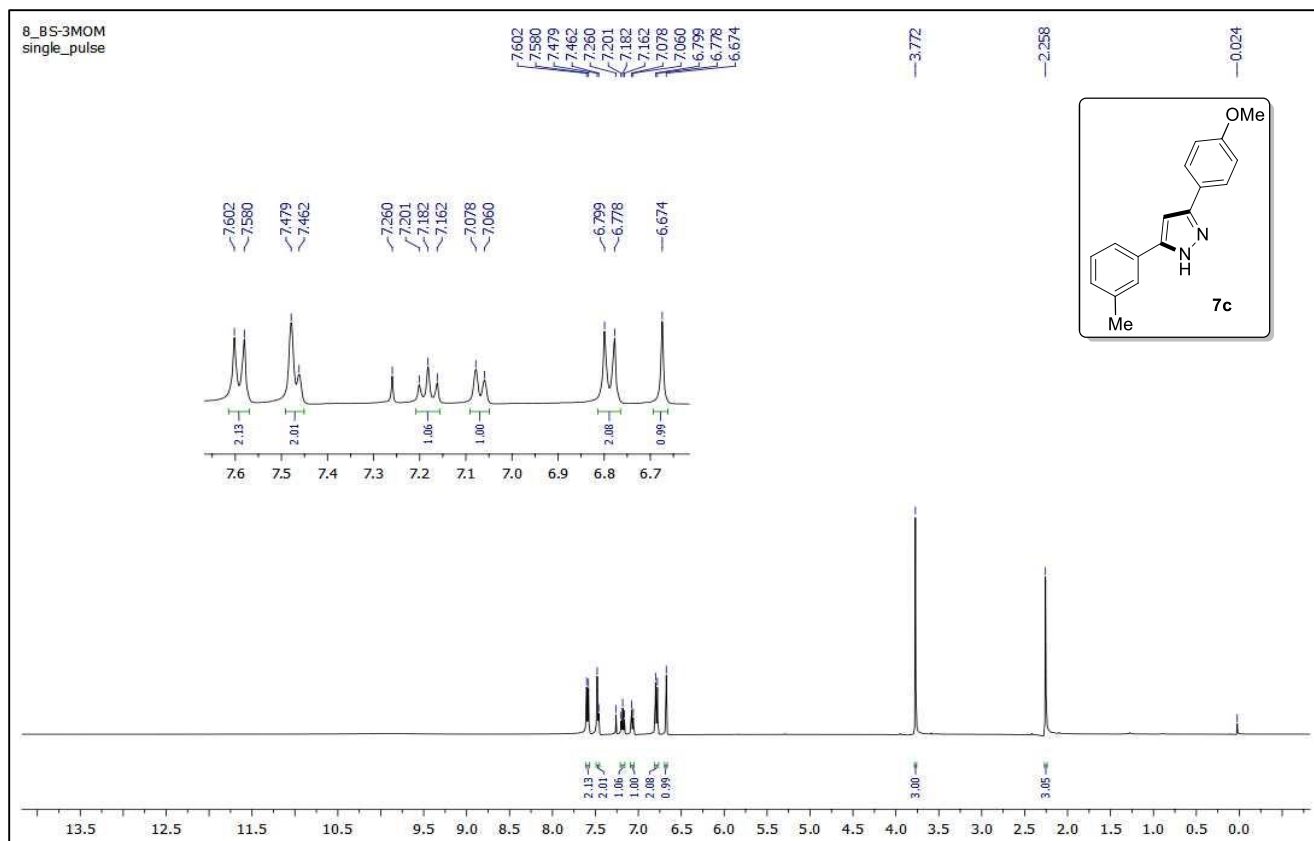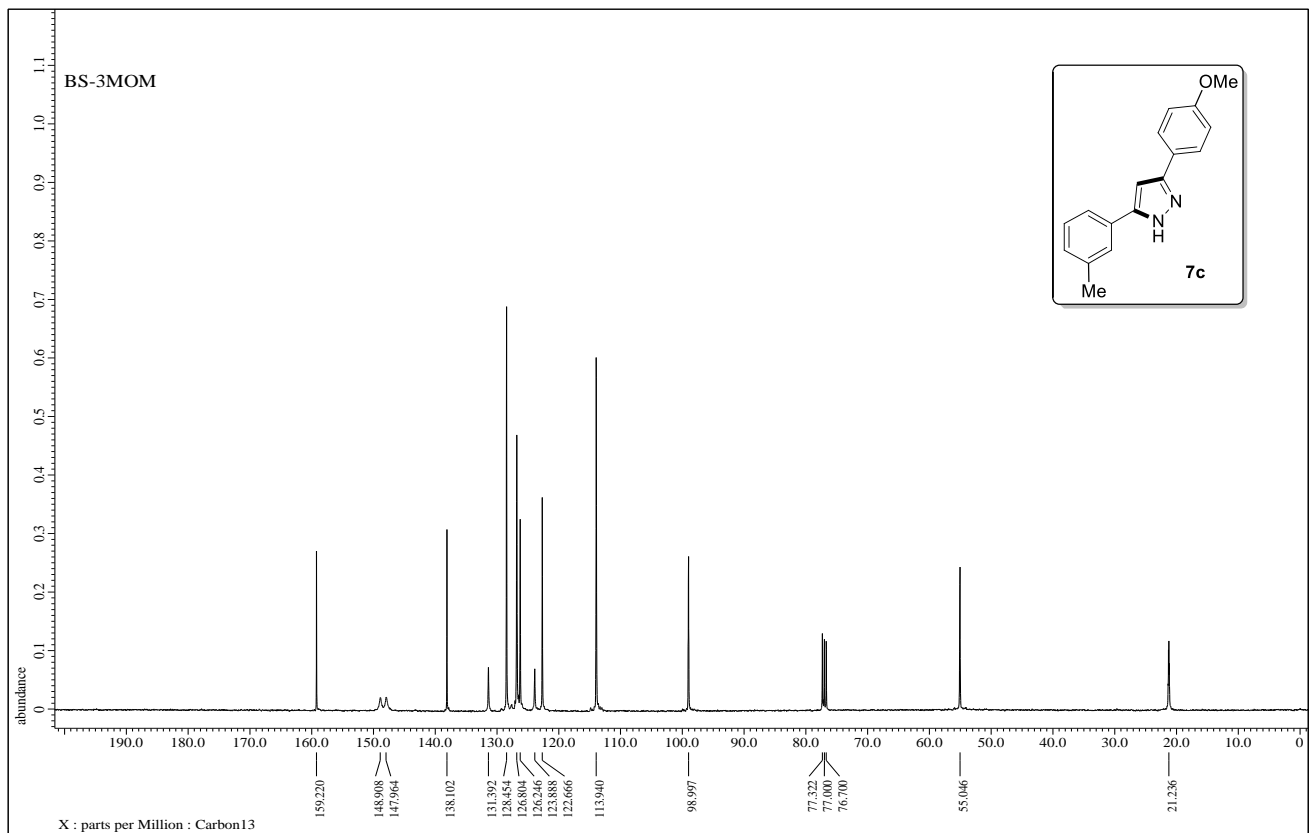

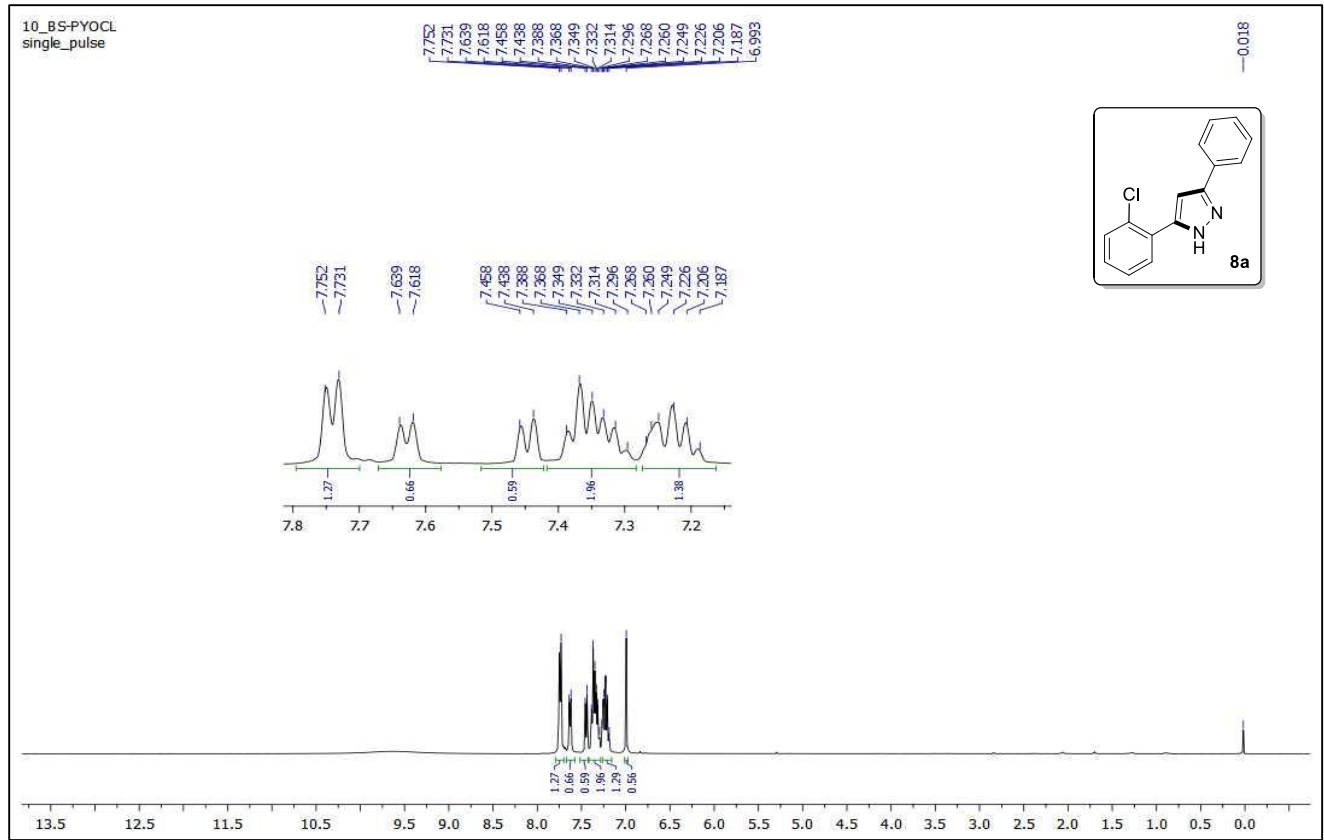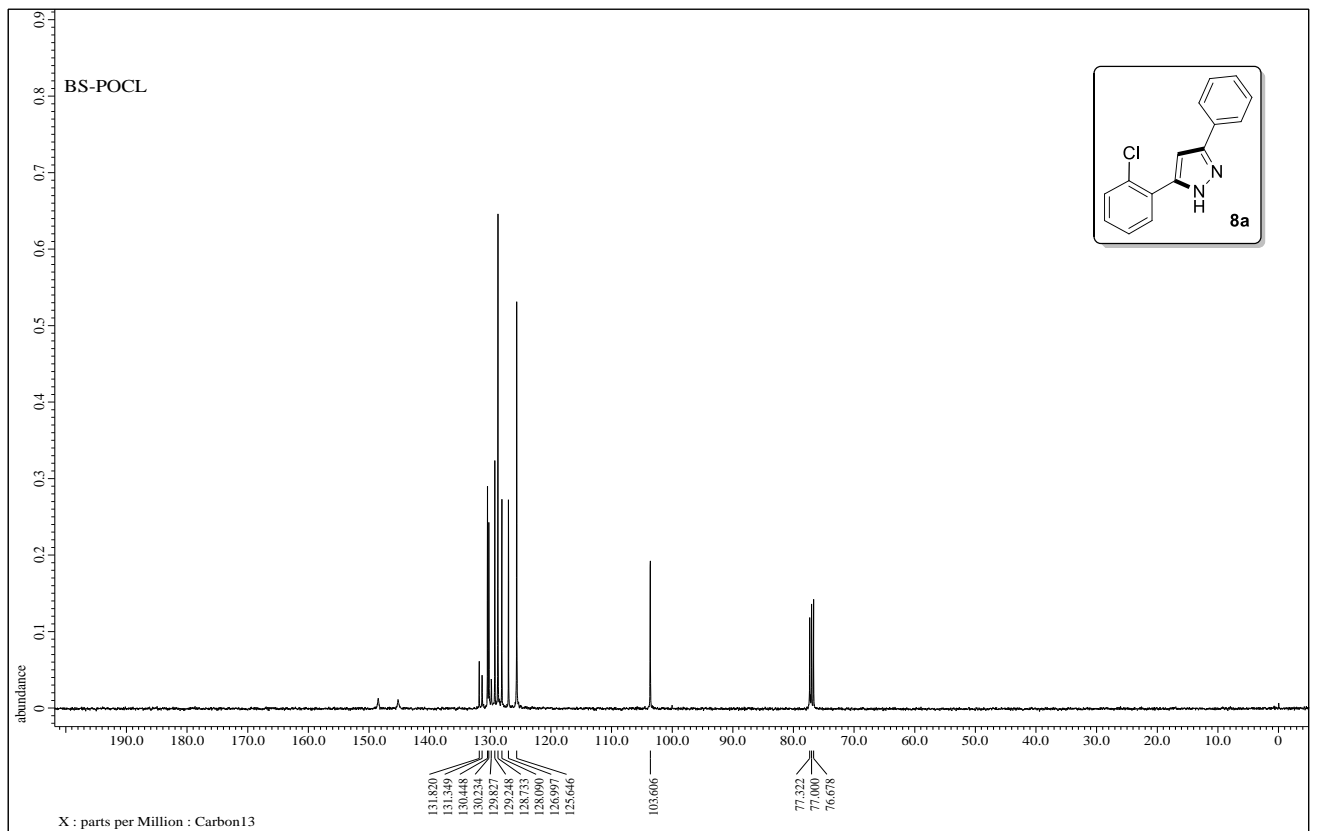

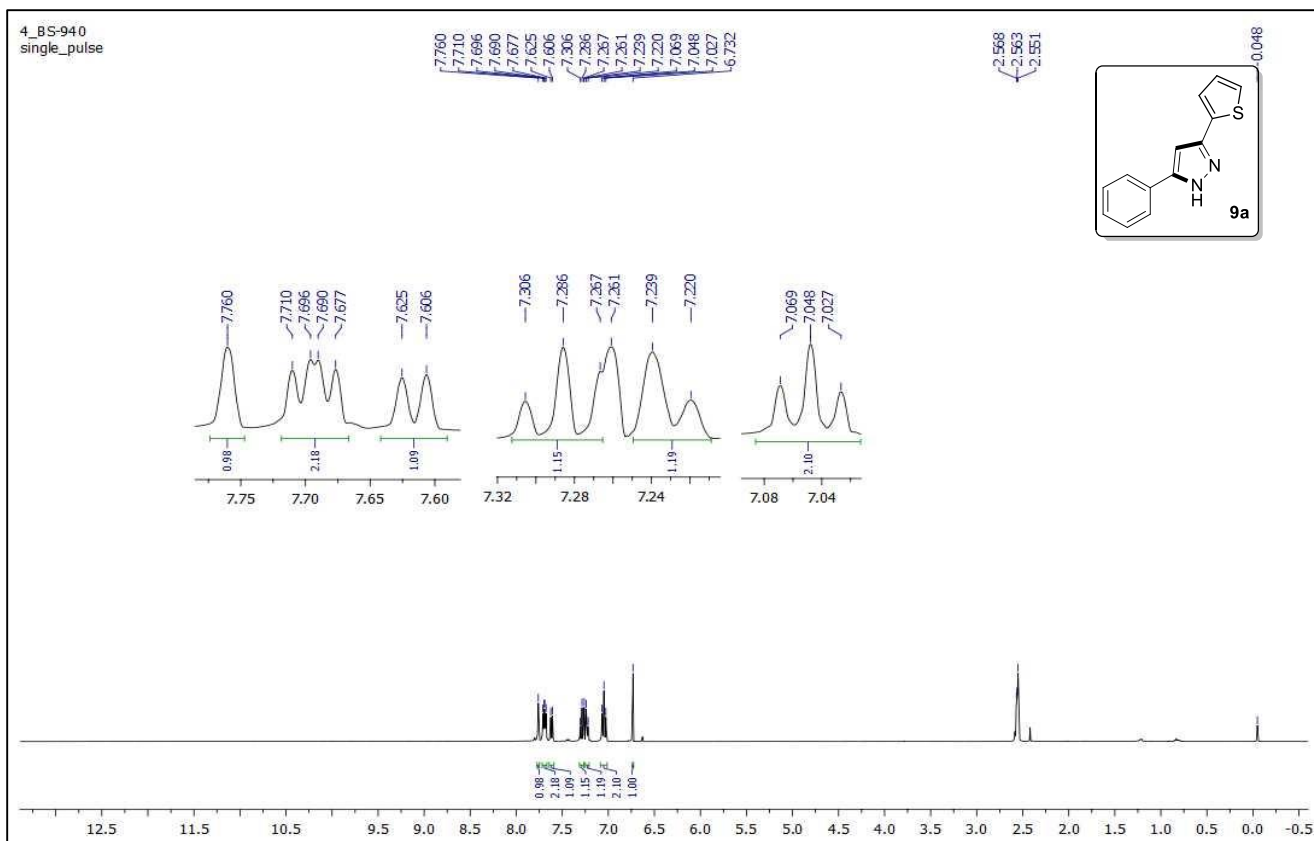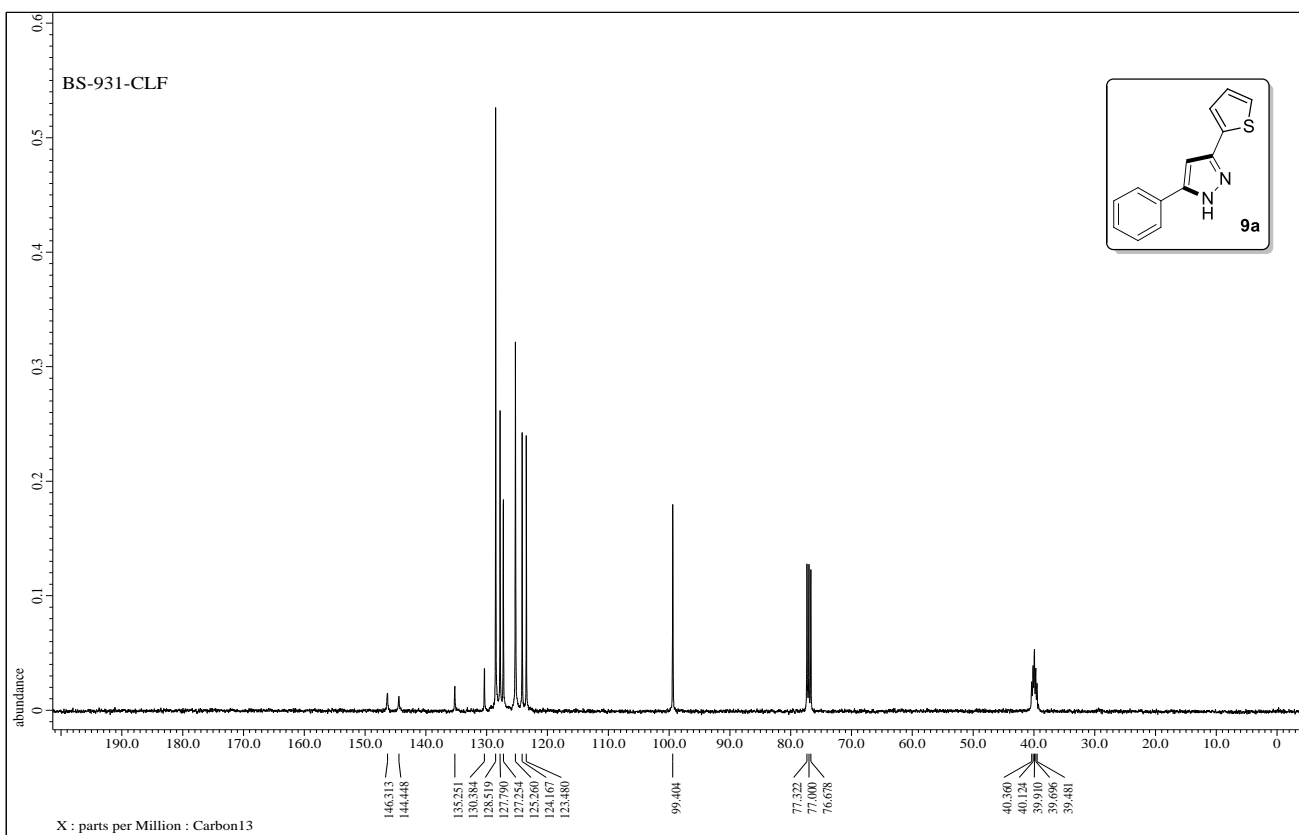

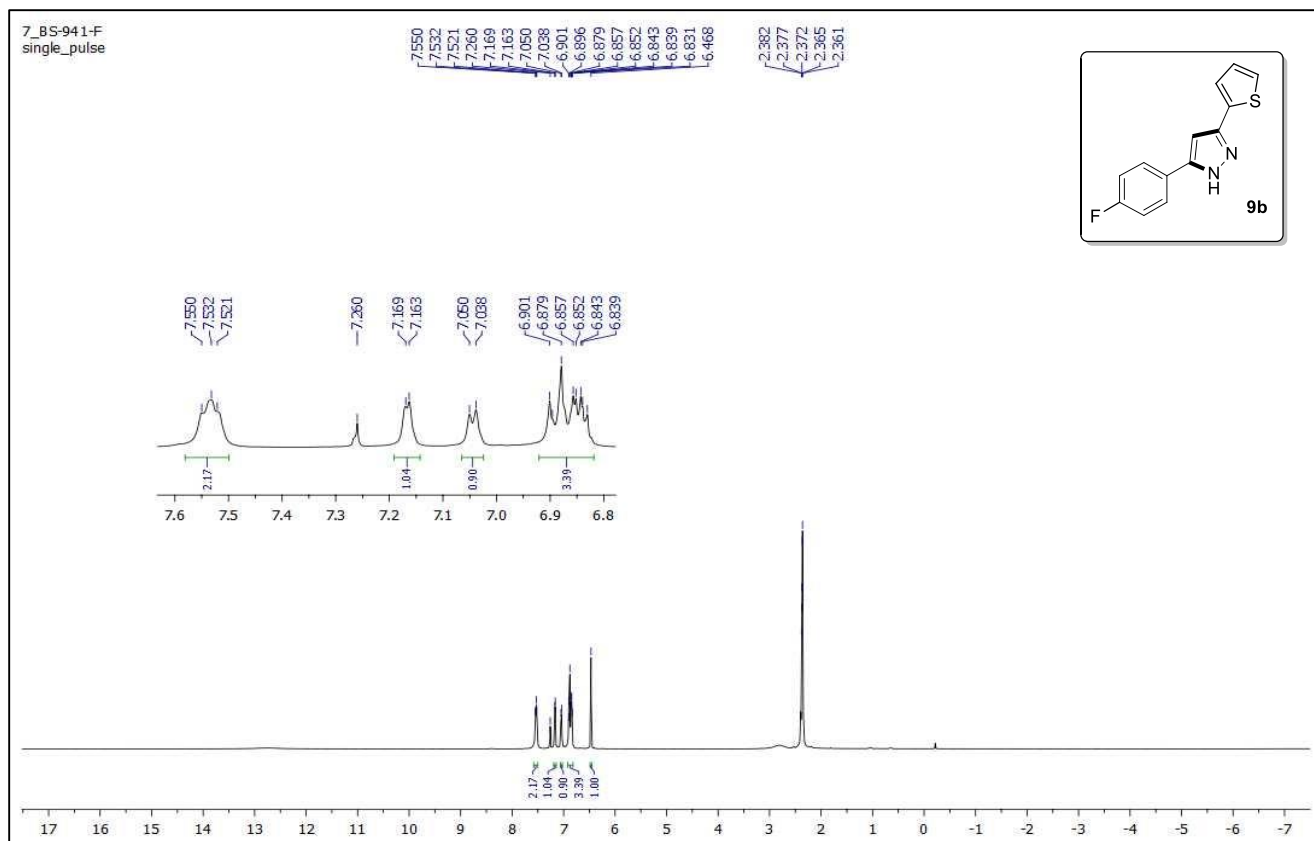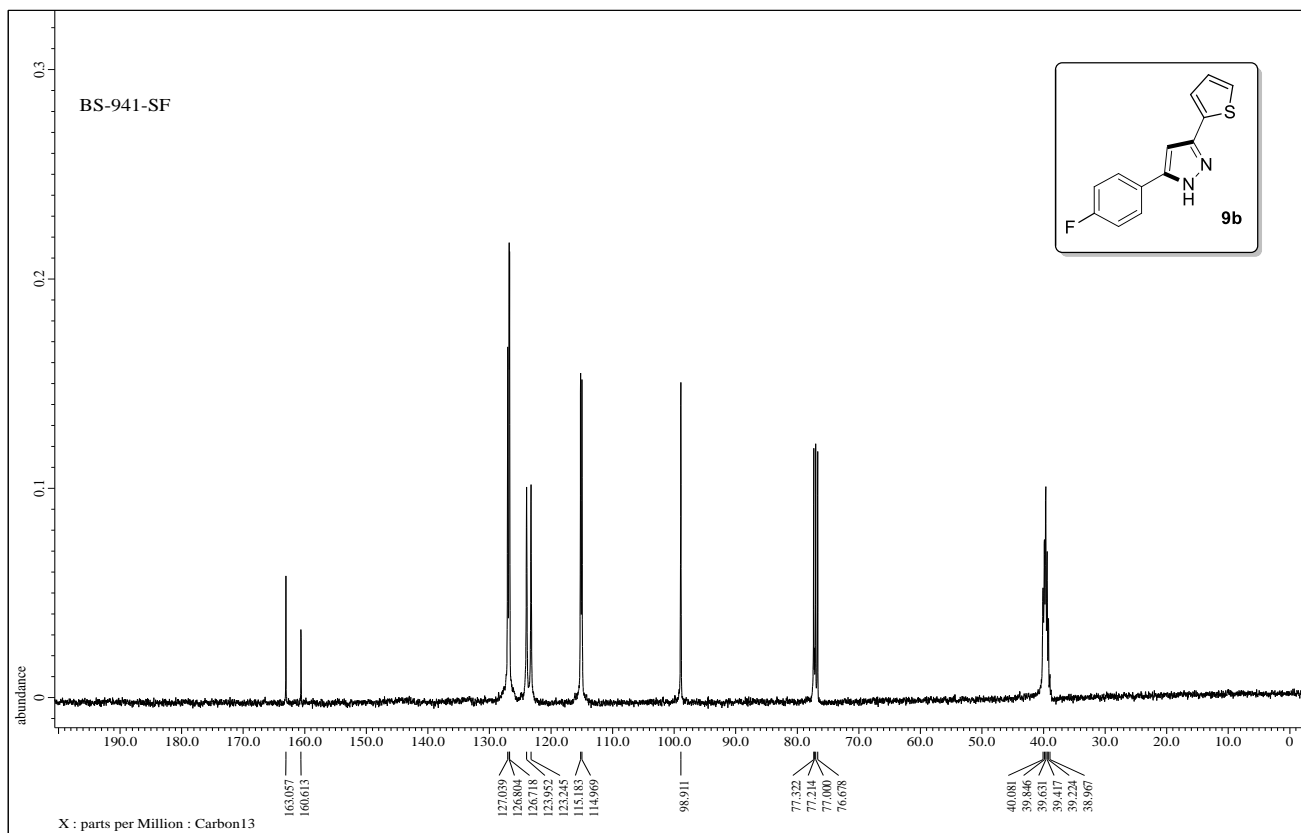

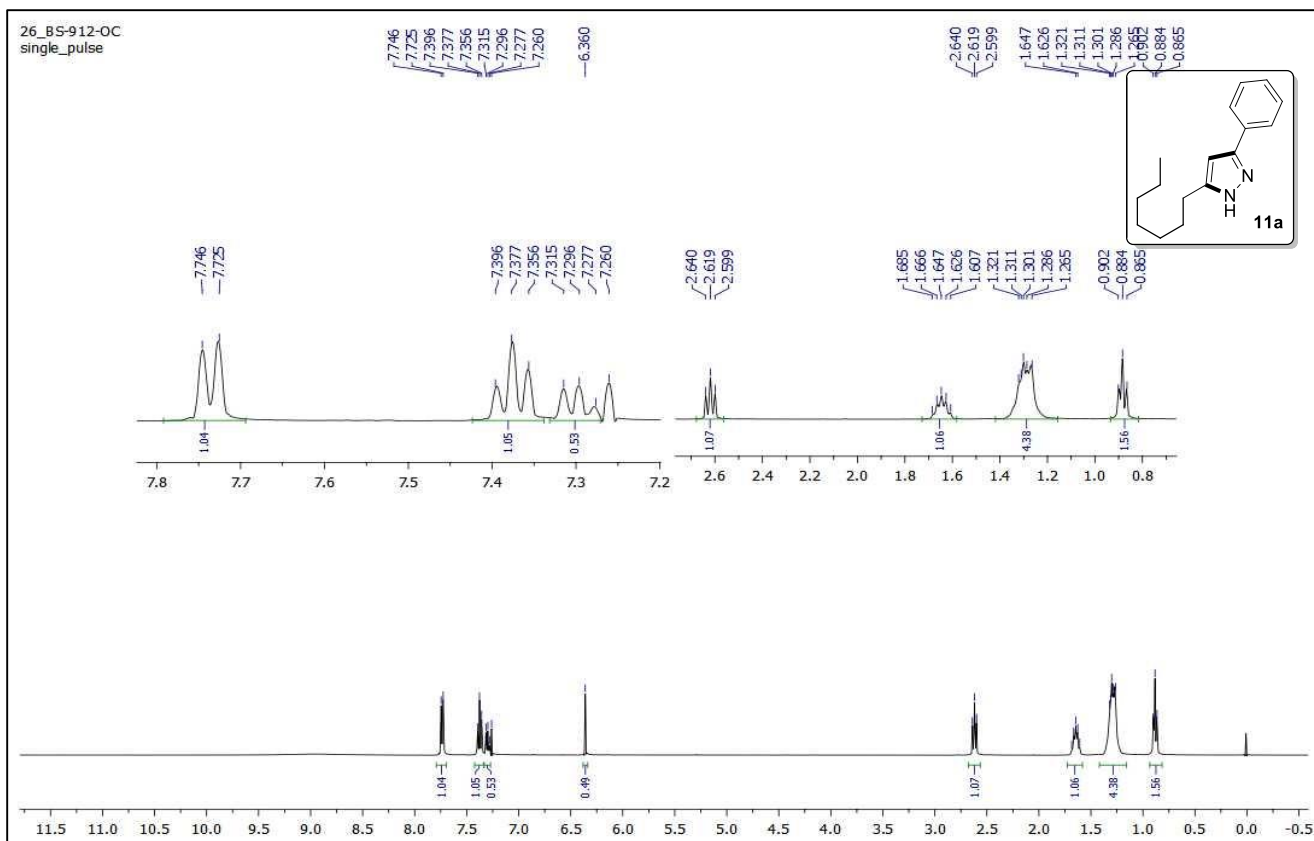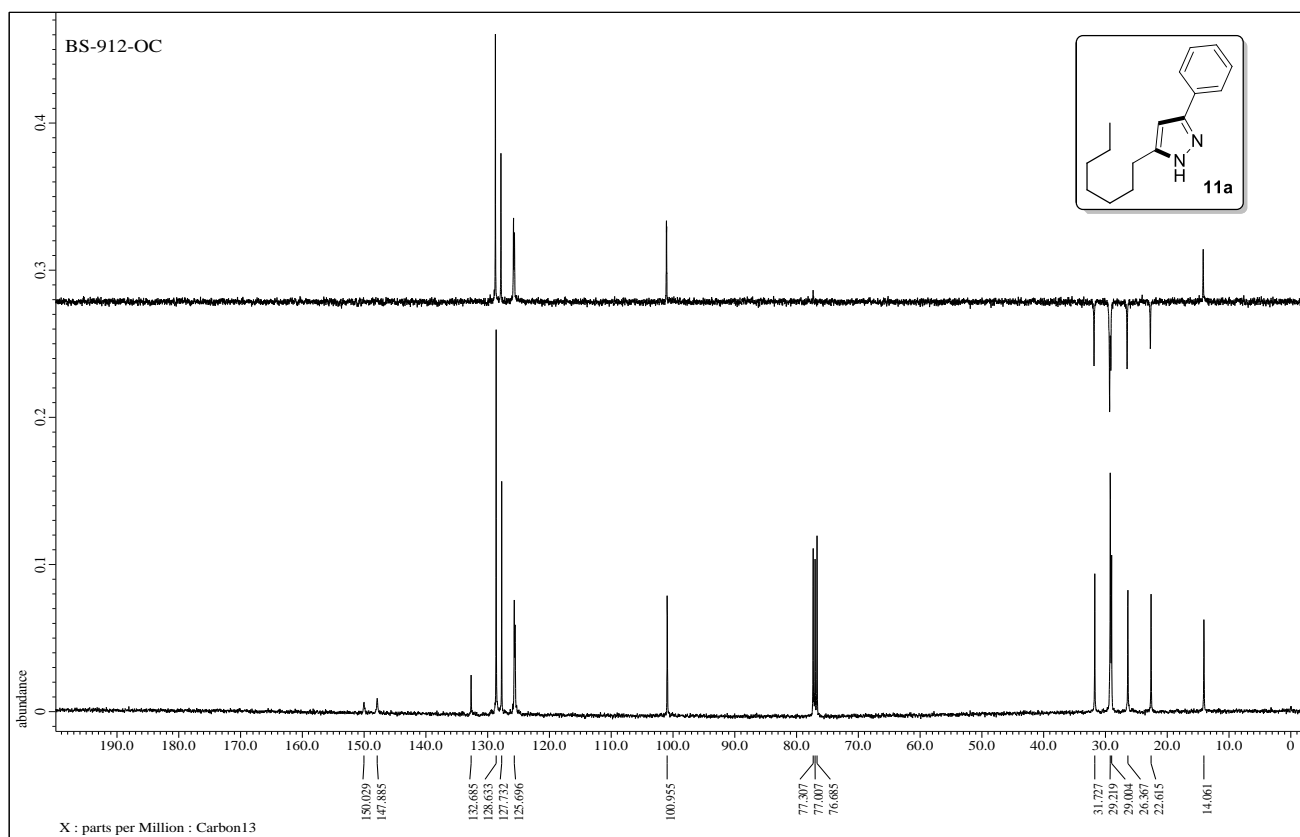

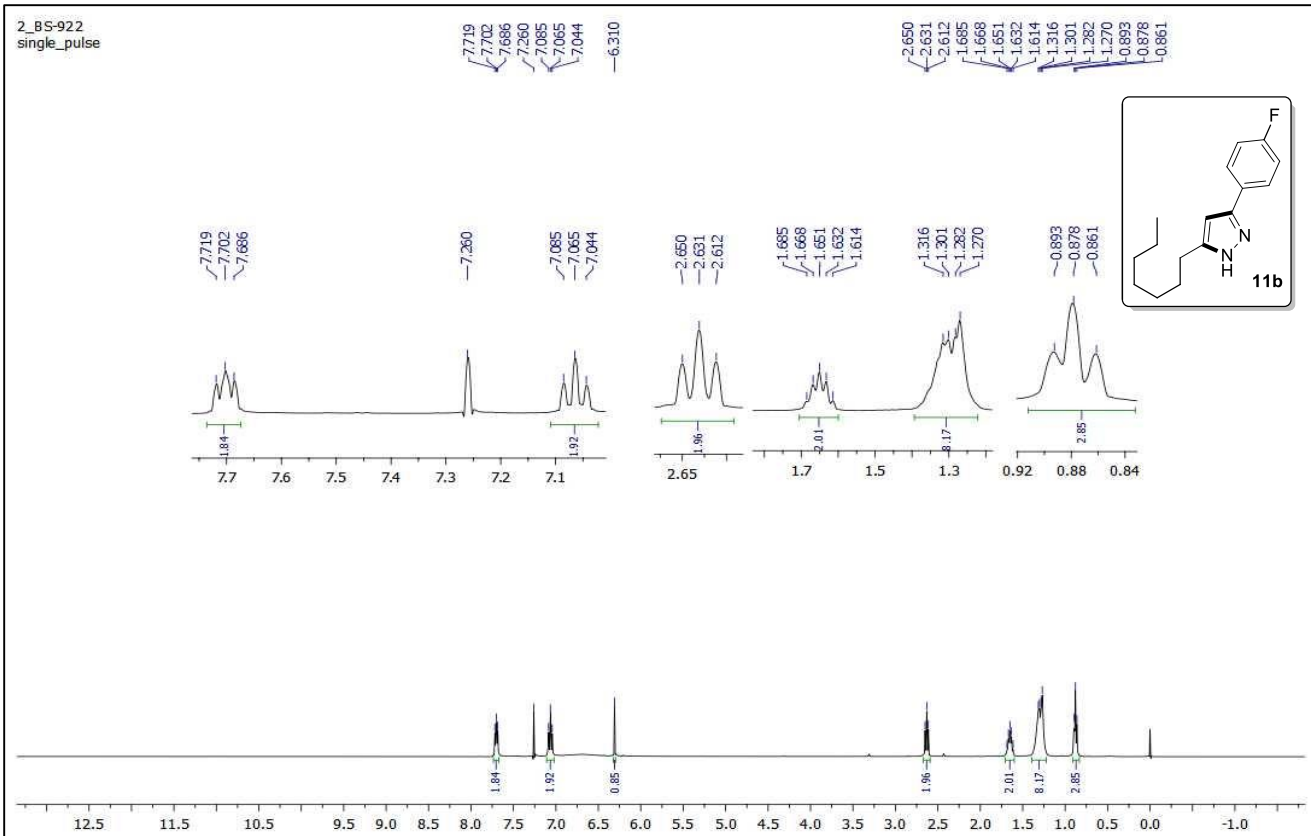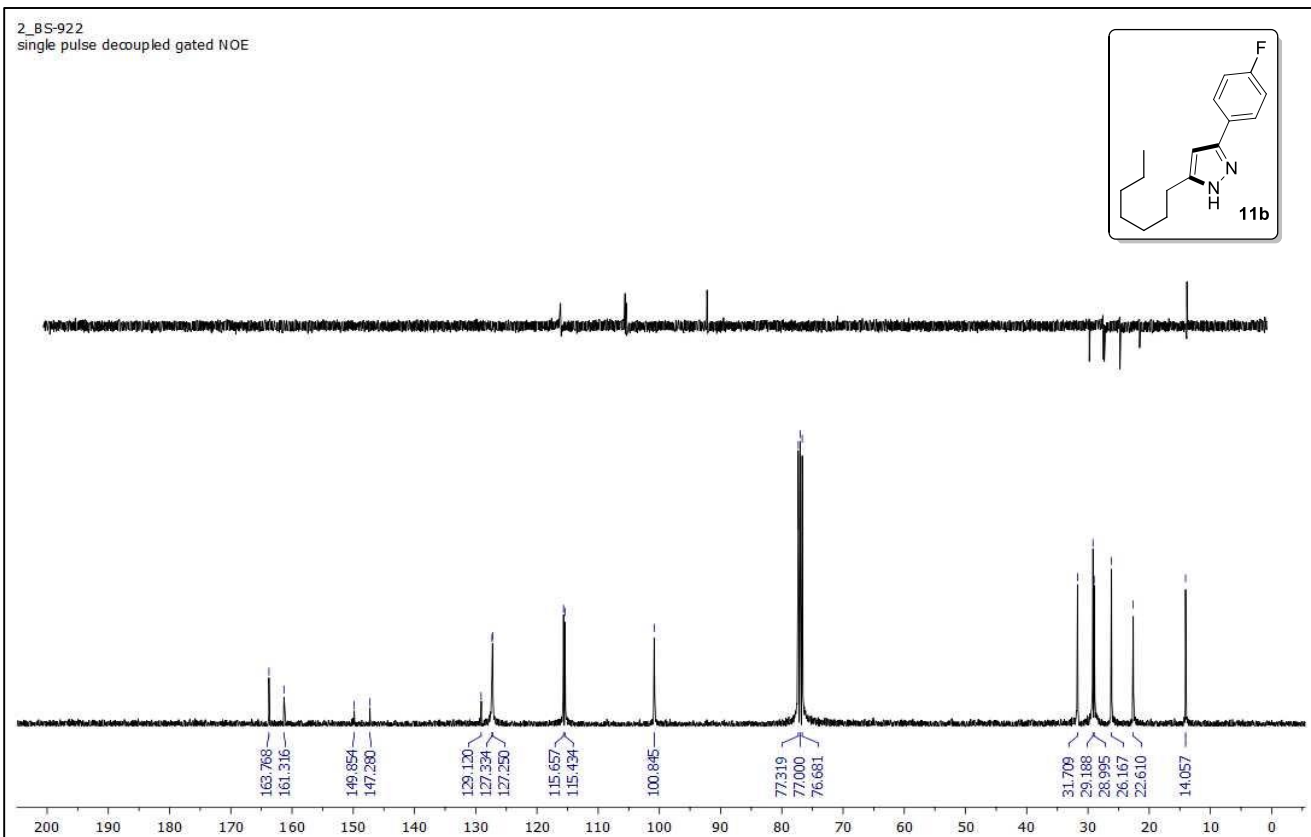



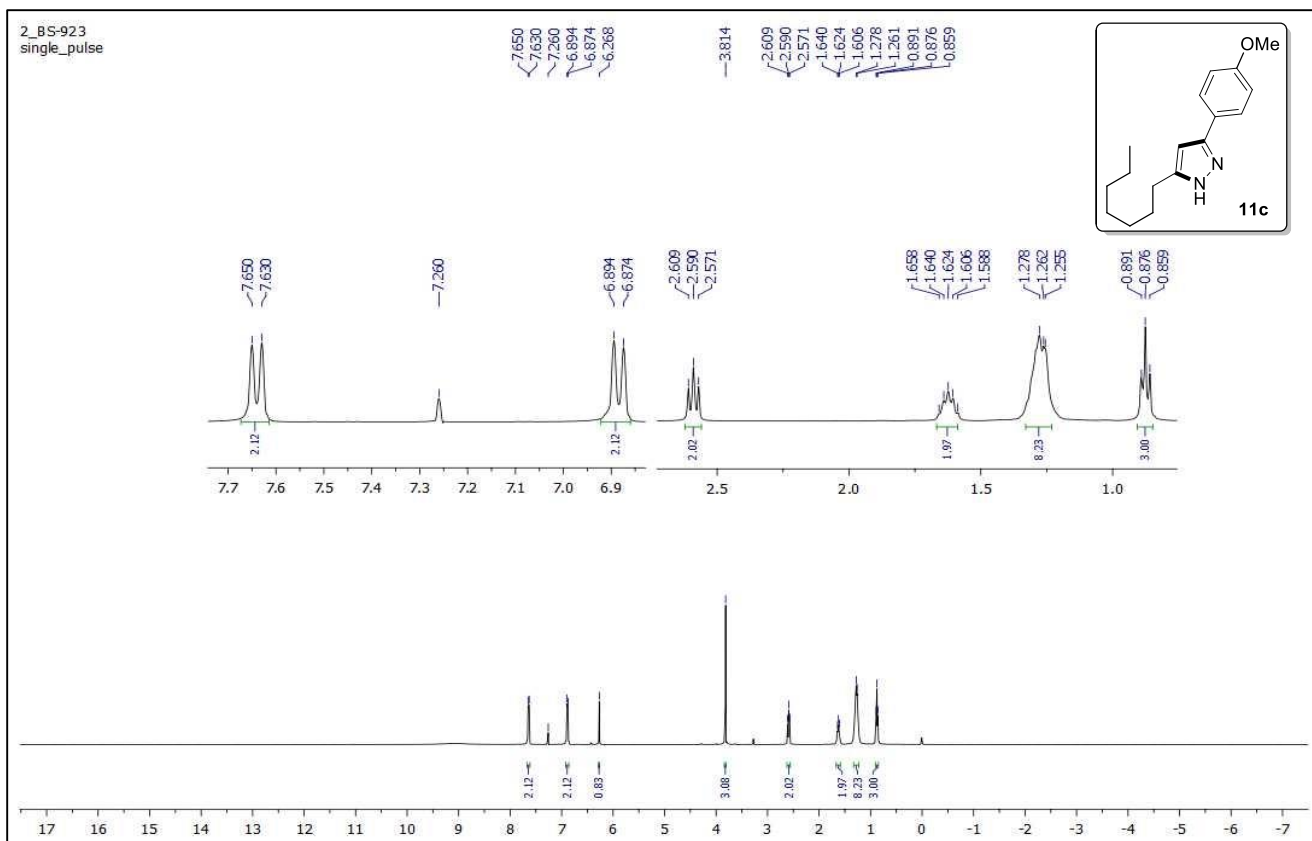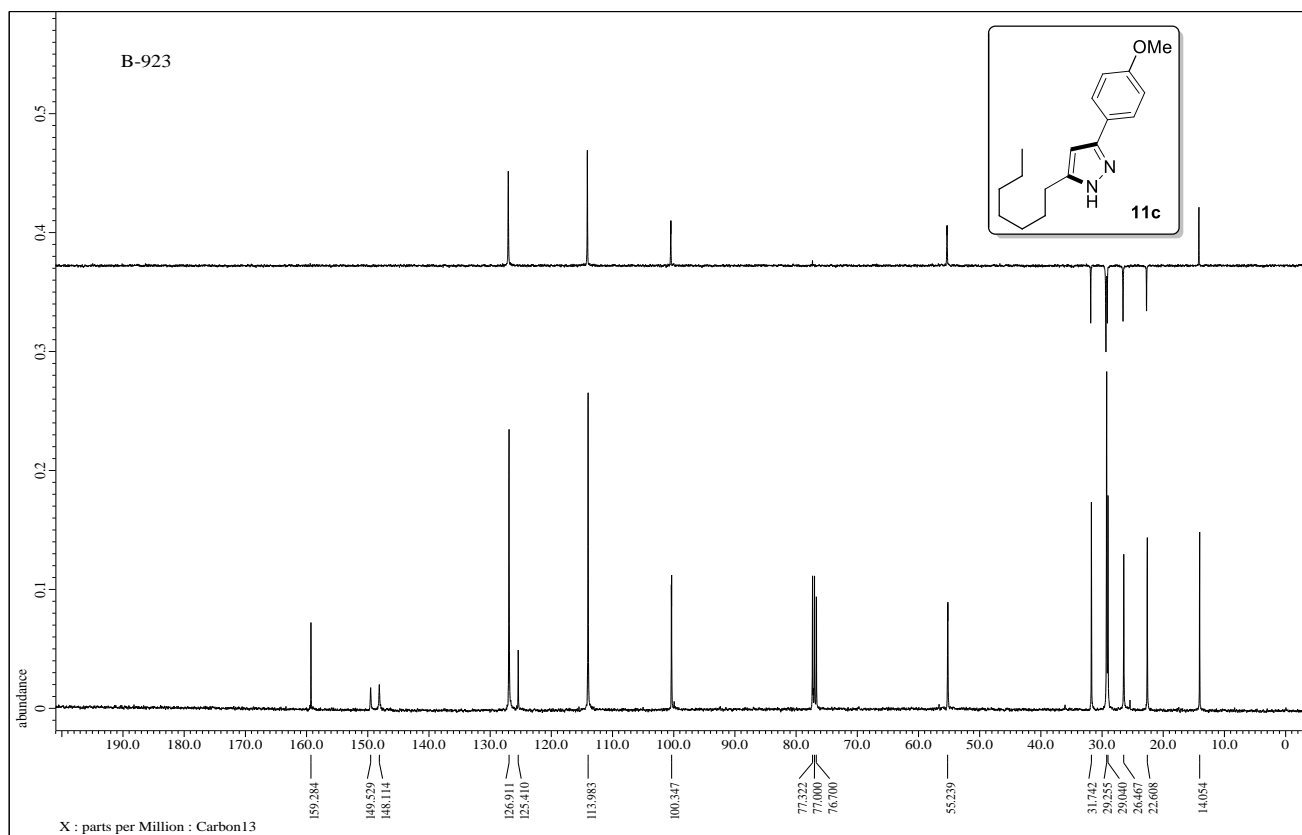

Supplement: d0ob01200a1.pdf [file d0ob01200a1.pdf]
